# Supplementary material for: Synthetic studies on the indane SHIP1 agonist AQX-1125
Source: Royal Society of Chemistry journal article supplement (doi:10.1039/d2ob00555g), 2022-01-01

# Supporting Information

## Synthetic Studies on the Indane SHIP1 Agonist AQX-1125

*Otto M. Dungan,<sup>a</sup> Shawn Dormann,<sup>a</sup> Sandra Fernandes,<sup>b</sup> Brian C. Duffy,<sup>a</sup> Daniel G. Effiong,<sup>a</sup> William G. Kerr<sup>a,b,c</sup> and John D. Chisholm<sup>a\*</sup>*

<sup>a</sup>Department of Chemistry, Syracuse University, 1-014 Center for Science and Technology, Syracuse, NY 13244; <sup>b</sup>Department of Microbiology and Immunology, SUNY Upstate Medical University, Syracuse, NY 13210; <sup>c</sup>Department of Pediatrics, SUNY Upstate Medical University, Syracuse, NY 13210

*jdchisho@syr.edu*

### Contents

|                                                |         |
|------------------------------------------------|---------|
| Table of Contents                              | S1      |
| Experimental Details                           | S2-S12  |
| <sup>1</sup> H and <sup>13</sup> C NMR Spectra | S13-S34 |

## **Synthesis of AOX-1125 and Analogs**

**General Methods:** All anhydrous reactions were run under a positive pressure of argon. All syringes, needles, and reaction flasks required for anhydrous reactions were dried in an oven and cooled under an N<sub>2</sub> atmosphere or in a desiccator. Dichloromethane and THF were dried by passage through an alumina column following the method of Grubbs (Pangborn, A. B.; Giardello, M. A.; Grubbs, R. H.; Rosen, R. K.; Timmers, F. J. *Organometallics* **1996**, *15*, 1518). Hexanes, ethyl acetate (EA) and all other reagents and solvents were purchased from commercial sources and used without further purification.

**Analysis and Purification.** Analytical thin layer chromatography (TLC) was performed on precoated glass backed plates (silica gel 60 F<sub>254</sub>; 0.25 mm thickness). The TLC plates were visualized by UV illumination and by staining. Solvents for chromatography are listed as volume:volume ratios. Flash column chromatography was carried out on silica gel (40-63 μm).

**Identity.** Proton (<sup>1</sup>H NMR) and carbon (<sup>13</sup>C NMR) nuclear magnetic resonance spectra were recorded at 300 or 400 MHz and 75 or 100 MHz respectively. The chemical shifts are given in parts per million (ppm) on the delta (δ) scale. Coupling constants are reported in hertz (Hz). Data are reported as follows: (s = singlet; d = doublet; t = triplet; q = quartet; p = pentet; dd = doublet of doublets; dt = doublet of triplets; td = triplet of doublets; tt = triplet of triplets; qd = quartet of doublets; ddd = doublet of doublet of doublets; br s = broad singlet). Where applicable, the number of protons attached to the corresponding carbon atom was determined by DEPT 135 NMR. Infrared (IR) spectra were obtained using an FTIR equipped with an attenuated total reflection (ATR) attachment. Melting points were recorded using an electrothermal melting point apparatus and are uncorrected. Molecular formula information was supported by combustion analysis. In cases where combustion analysis was difficult to obtain due to the small quantities of compound prepared, high resolution mass spectrometry (HRMS) was used to determine the molecular formula. HRMS data was obtained using positive-ion and negative-ion mode electrospray ionization with an Apollo II ion source on a Bruker 10 Tesla APEX -Qe FTICR-MS at Old Dominion University.

**Purity.** Compound homogeneity was determined via <sup>1</sup>H and <sup>13</sup>C NMR spectra after silica gel chromatography, a copy of the spectra for new compounds is included in the supporting information. In most cases purity was supported by combustion analysis, with elemental analytical values for carbon and hydrogen (and nitrogen, if present) agreeing with calculated values within 0.4%. Elemental analyses were performed on an elemental analyzer with a thermal conductivity detector and 2 meter GC column maintained at 50 °C.

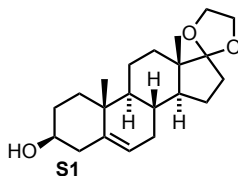

**5-Androsten-3β-ol-17-ethylene ketal (S1).** (This compound has been previously reported, see: Calogeropoulou, T.; Avlonitis, N.; Minas, V.; Alexi, X.; Pantzou, A.; Charalampopoulos, I.; Zervou, M.; Vergou, V.; Katsanou, E. S.; Lazaridis, I.; Alexis, M. N.; Gravanis, A. “Novel Dehydroepiandrosterone Derivatives with Antiapoptotic, Neuroprotective Activity.” *J. Med. Chem.* **2009**, *52*, 6569.)

Dehydroepiandrosterone (5.00 g, 17.3 mmol) was added to a flame dried round-bottom flask. 50 mL of dry benzene was added. *p*-Toluene sulfonic acid monohydrate (0.114 g, 0.66 mmol) and ethylene glycol (5.00 mL) were then added to the reaction. This reaction mixture was heated to reflux using a Dean-Stark trap for 24 h under argon. The mixture was then removed from heat and allowed to cool to rt. The excess benzene was removed under reduced pressure with a rotary evaporator. The remaining residue was diluted with diethyl ether (150 mL) and washed successively with sat. aq. NaHCO<sub>3</sub> (2 × 75 mL) and sat. aq. NaCl

(1 x 75 mL). The organic layer was dried with anhydrous Na<sub>2</sub>SO<sub>4</sub>, filtered and concentrated under reduced pressure. Purification by silica gel chromatography (30% EA/70% hexanes) provided ketal **S1** as a white colored solid (0.553 g, 96%). mp = 73-74 °C; TLC *R<sub>f</sub>* = 0.28 (30% EA/70% hexanes); <sup>1</sup>H NMR (400 MHz, CDCl<sub>3</sub>) δ 5.40-5.32 (m, 1H), 3.99-3.81 (m, 4H), 3.61-3.46 (m, 1H), 2.39-2.17 (m, 2H), 2.09-1.95 (m, 2H), 1.92-1.76 (m, 3H), 1.75-1.66 (m, 1H), 1.65-1.57 (m, 2H), 1.51-1.36 (m, 6H), 1.34-1.18 (m, 2H), 1.13-1.03 (m, 1H), 1.01 (s, 3H), 0.99-0.93 (m, 1H), 0.86 (s, 3H); <sup>13</sup>C NMR (100 MHz, CDCl<sub>3</sub>) δ 140.7, 121.5, 119.5, 71.7, 65.2, 64.6, 50.6, 50.0, 45.7, 42.3, 37.3, 36.6, 34.2, 32.2, 31.6, 31.2, 30.6, 22.8, 20.5, 19.4, 14.2. Anal calcd for C<sub>21</sub>H<sub>32</sub>O<sub>3</sub>: C, 75.86; H, 9.70;. Found: C, 75.90; H, 9.85.

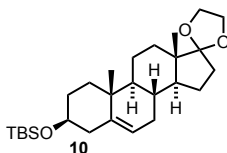

**5-Androsten-3β-ol-17-ethylene ketal tert-butyl dimethylsilyl ether (10).** Ketal **S1** (5.00 g, 15.0 mmol) was added to a flame dried round-bottom flask. 27 mL of DMF and 27 mL of DCM were added to dissolve the ketal. Imidazole (2.51 g, 36.8 mmol) and *tert*-butyl (chloro) dimethylsilane (3.51 g, 23.3 mmol) were then added. This reaction mixture was allowed to stir at rt for 20 h under argon. The excess solvent was then removed under reduced pressure. The remaining contents were diluted with diethyl ether (150 mL) and washed successively with 5% aq. HCl (2 × 75 mL), saturated NaHCO<sub>3</sub> (2 × 75 mL) and saturated aq. NaCl (75 mL). The organic layer was then dried with anhydrous MgSO<sub>4</sub>, filtered and concentrated under reduced pressure to yield silyl ether **10** as a white colored solid (6.53 g, 97%). TLC *R<sub>f</sub>* = 0.74 (30% EA/70% hexanes); IR (neat) 2928, 1471, 1460, 1254, 1077, 834, 772 cm<sup>-1</sup>; <sup>1</sup>H NMR (300 MHz, CDCl<sub>3</sub>) δ 5.32-5.30 (m, 1H), 3.98-3.82 (m, 4H), 3.52-3.44 (m, 1H), 2.29-2.10 (m, 2H), 2.00-1.95 (m, 2H), 1.87-1.66 (m, 3H), 1.63-1.53 (m, 3H), 1.53 (s, 3H), 1.52-1.36 (m, 4H), 1.35-1.19 (m, 1H), 1.07-1.04 (m, 1H), 1.01 (s, 3H), 0.89 (s, 9H), 0.86 (s, 3H), 0.06 (s, 6H). <sup>13</sup>C NMR (75 MHz, CDCl<sub>3</sub>) δ 141.5, 120.9, 119.6, 72.5, 65.1, 64.5, 50.6, 50.0, 45.7, 42.8, 37.3, 36.6, 34.2, 32.2, 32.0, 31.2, 30.6, 25.9, 22.7, 20.4, 19.4, 18.2, 14.2, -4.5. Anal calcd for C<sub>27</sub>H<sub>46</sub>O<sub>3</sub>Si: C, 72.59; H, 10.38;. Found: C, 72.33; H, 10.24.

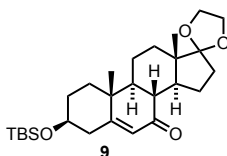

**5-Androsten-7-one-3β-ol 17-ethylene ketal tert-butyl dimethylsilyl ether (9).** *tert*-Butyl dimethylsilyl ether **10** (6.00 g, 13.4 mmol) was added to a flame dried round-bottom flask. 24 mL of cyclohexane and 3 mL of water were added to dissolve the ketal. Ruthenium trichloride trihydrate (0.022 g, 0.084 mmol, 0.6 mol %) was added followed by the dropwise addition of 70% *tert*-butyl hydroperoxide solution (aq., 14 mL, 102 mmol). This reaction stirred for 22 h under argon. The mixture was then diluted with EA (100 mL) and filtered through celite. The filtrate was washed successively with 25% aq. Na<sub>2</sub>SO<sub>3</sub> (2 × 75 mL) and sat. aq. NaCl (75 mL). The organic layer was then dried with anhydrous Na<sub>2</sub>SO<sub>4</sub>, filtered and concentrated. The residue was recrystallized from EA to provide the unsaturated ketone **9** as a pale-yellow solid (3.34 g, 54%). mp = 183-184 °C; TLC *R<sub>f</sub>* = 0.21 (10% EA/90% hexanes); IR (neat) 2979, 2857, 1727, 1656, 1625, 1470, 1459, 1351, 1092 cm<sup>-1</sup>; <sup>1</sup>H NMR (400 MHz, CDCl<sub>3</sub>) δ 5.67 (s, 1H), 3.99-3.74 (m, 4H), 3.68-3.55 (m, 1H), 2.56-2.43 (m, 3H), 2.29-2.18 (m, 1H), 2.06-1.88 (m, 2H), 1.87-1.73 (m, 3H), 1.69-1.59 (m, 2H), 1.54-1.38 (m, 5H), 1.23-1.15 (m, 4H), 0.89 (s, 9H), 0.86 (s, 3H), 0.06 (s, 6H); <sup>13</sup>C NMR (100 MHz, CDCl<sub>3</sub>) δ 201.7, 166.1, 125.8, 118.7, 71.2, 65.2, 64.4, 49.9, 46.1, 45.3, 44.3, 42.5, 38.3, 36.4, 34.1, 31.7, 29.6, 25.8, 25.1, 20.6, 18.1, 17.3, 14.4, -4.6, -4.7. Anal calcd for C<sub>27</sub>H<sub>44</sub>O<sub>4</sub>Si: C, 70.39; H, 9.63;. Found: C, 70.00; H, 9.29.

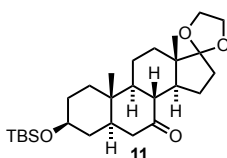

**5-Androsta-7-one-3 $\beta$ -ol 17-ethylene ketal tert-butyldimethylsilyl ether (11).** Enone **9** (2.13g, 4.62 mmol) was dissolved in 140 mL of EA and 10% Pd/C (0.45 g, 0.42 mmol, 9 mol %) was added. The mixture was then placed under vacuum and the atmosphere inside the flask replaced with hydrogen using a hydrogen balloon. The reaction mixture was stirred under a hydrogen atmosphere for 20 h at rt. The reaction was then filtered through celite with EA and concentrated under reduced pressure to yield ketone **11** as a white colored solid (2.02 g, 94%). mp = 198-200 °C; TLC  $R_f$  = 0.30 (10% EA/90% hexanes); IR (ATR) 2979, 1698, 1091  $\text{cm}^{-1}$ ;  $^1\text{H}$  NMR (400 MHz,  $\text{CDCl}_3$ ) 3.98-3.78 (m, 4H), 3.61-3.48 (m, 1 H), 2.33 (t,  $J$  = 11.8 Hz, 2H), 2.29-2.18 (m, 1H), 2.04-1.56 (m, 7H), 1.53-1.29 (m, 6H), 1.24-1.09 (m, 2H), 1.07 (s, 3H), 1.05-0.92 (m, 2H), 0.87 (s, 9H), 0.83 (s, 3H), 0.04 (s, 6H);  $^{13}\text{C}$  NMR (75 MHz,  $\text{CDCl}_3$ )  $\delta$  211.4, 118.7, 71.4, 65.2, 64.4, 55.3, 50.1, 46.6, 45.9, 45.7, 43.4, 38.4, 36.3, 35.9, 34.1, 31.5, 29.7, 25.8, 23.8, 21.3, 18.2, 14.4, 11.8, -4.7. Anal calcd for  $\text{C}_{27}\text{H}_{46}\text{O}_4\text{Si}$ : C, 70.08; H, 10.02;. Found: C, 69.70; H, 9.93.

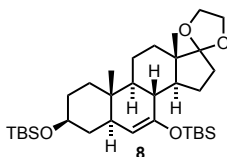

**5-Androsta-7-tert-butyldimethyl oxysilane-3 $\beta$ -ol 17-ethylene ketal tert-butyldimethylsilyl enol ether (8).** Ketone **11** (3.30 g, 7.13 mmol) was dissolved in 65 mL of DCM. The reaction was then cooled to 0 °C and triethylamine (38.8 mL, 278 mmol) was added dropwise. After 15 min at 0 °C, *tert*-butyldimethylsilyl trifluoromethanesulfonate (9.80 mL, 42.8 mmol) was then added to the reaction with the temperature being maintained at 0 °C. This reaction mixture was then allowed to warm to rt and allowed to stir for 20 h under argon. The mixture was then re-cooled to 0 °C and isopropyl alcohol (1.1 mL) was added. The reaction was then diluted with DCM (150 mL) and saturated  $\text{NaHCO}_3$  (150 mL). The organic phase was separated and the aqueous phase was extracted 2x with DCM (100 mL). The combined organic layers were then washed with sat. aq.  $\text{NaHCO}_3$  (1  $\times$  100 mL) and sat. aq.  $\text{NaCl}$  (1  $\times$  100 mL). The organic extracts were then dried ( $\text{Na}_2\text{SO}_4$ ), filtered and concentrated under reduced pressure. The residue was subjected to silica gel chromatography (10% EA/90% hexanes) to yield silyl enol ether **8** as a pale-yellowish solid (3.40 g, 83%). TLC  $R_f$  = 0.58 (10% EA /90% hexanes); IR (neat) 2927, 2854, 1655, 1470, 1103, 1082, 1054  $\text{cm}^{-1}$ ;  $^1\text{H}$  NMR (300 MHz,  $\text{CDCl}_3$ )  $\delta$  4.38 (s, 1H), 3.96-3.79 (m, 4H), 3.58 (sep,  $J$  = 5.2 Hz, 1H), 1.99-1.85 (m, 4 H), 1.82-1.57 (m, 6 H), 1.52-1.45 (m, 2H), 1.42-1.15 (m, 4H), 1.12-0.97 (m, 2H), 0.91 (s, 9 H), 0.88 (s, 12 H), 0.74 (s, 3H), 0.11 (s, 3H), 0.10 (s, 3H), 0.06 (s, 6H);  $^{13}\text{C}$  NMR (100 MHz,  $\text{CDCl}_3$ )  $\delta$  152.2, 118.7, 108.4, 72.1, 65.2, 64.5, 53.9, 48.6, 47.5, 43.4, 42.0, 37.3, 34.9, 34.5, 34.3, 31.9, 30.8, 26.1, 25.9, 25.7 (2C), 20.9, 18.3, 18.2, 18.1, 14.7, 11.3, -2.9 (2C), -3.9, -4.2, -4.55, -4.56. Anal calcd for  $\text{C}_{21}\text{H}_{32}\text{O}_3$ : C, 68.69; H, 10.48; Found: C, 68.39; H, 10.62.

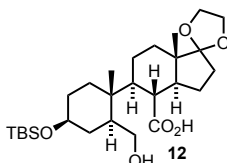

**(7a'S)-5'-((1R,4S)-4-((tert-butyldimethylsilyl)oxy)-2-(hydroxymethyl)-1-methylcyclohexyl)-7a'-methyloctahydrospiro[[1,3]dioxolane-2,1'-indene]-4'-carboxylic acid (12).** Silyl enol ether **8** (4.41 g, 7.64 mmol) was dissolved in methanol (122 mL) and DCM (122 mL) and cooled to -78 °C. Ozone gas was then bubbled through this solution until a blue color was observed. The excess ozone was then removed by purging with argon gas, the blue color dissipated. The reaction mixture was then allowed to

warm to 0 °C and sodium borohydride (0.866 g, 22.9 mmol) was added. The reaction mixture was then allowed to warm to rt and allowed to stir for 20 h. More NaBH<sub>4</sub> (0.288 g, 7.6 mmol) was added and the mixture stirred for another 3 h. Most of the solvent was removed on a rotary evaporator, and DCM was added (150 mL) followed by water (150 mL). The solution foamed from the evolution of H<sub>2</sub> gas so 10% HCl was added drop wise until the foaming stopped. The DCM layer was separated and the aqueous layer extracted with DCM (3 × 75 mL). The combined organic extracts were washed with sat. aq. NaCl (2 × 75 mL). The organic layer was then dried with anhydrous Na<sub>2</sub>SO<sub>4</sub>, filtered and concentrated. Purification by silica gel chromatography (10% MeOH/ 90% DCM) provided carboxylic acid **12** as a cream colored solid (2.39 g, 63%). TLC R<sub>f</sub> = 0.47 (10% MeOH/ 90% DCM); IR (neat) 3404, 1701, 1053 cm<sup>-1</sup>; <sup>1</sup>H NMR (400 MHz, CDCl<sub>3</sub>) δ 6.57 (bs, 1H), 3.96-3.77 (m, 4H), 3.71 (d, *J* = 9.2 Hz, 1H), 3.49 (bs, 1H), 3.25 (s, 1H), 2.29 (t, *J* = 10.8 Hz, 1H), 2.04-1.82 (m, 4H), 1.81-1.69 (m, 3H), 1.68-1.45 (m, 4H), 1.44-1.18 (m, 7H), 0.86 (s, 12H), 0.79 (s, 3H), 0.03 (s, 6H); <sup>13</sup>C NMR (100 MHz, CDCl<sub>3</sub>) δ 182.1, 118.7, 71.0, 65.2, 64.6, 62.6, 47.5, 45.5, 45.1, 45.0, 42.1, 37.7, 34.4, 33.6, 31.2, 29.9, 25.9 (2C), 22.9, 20.7, 19.3, 18.2, 13.7, -4.6. Anal calcd for C<sub>18</sub>H<sub>28</sub>O<sub>4</sub>: C, 65.28; H, 9.74 Found: C, 65.25; H, 9.76.

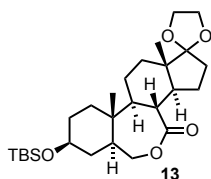

**(2'*R*,5'*S*,16'*S*)-5'-((tert-butyldimethylsilyloxy)-2',16'-dimethylspiro[1,3-dioxolane-2,15'-9]oxatetracyclo[9.7.0.0<sup>2,7</sup>.0<sup>12,16</sup>]octadecan]-10'-lactone (13).** Carboxylic acid **12** (1.50 g, 3.02 mmol) was dissolved in 45 mL of DCM and DMAP (0.074 g, 0.604 mmol) was added. After stirring for 5 min, 1-ethyl-3-(3-dimethylaminopropyl)carbodiimide (0.94 g, 6.04 mmol) was then added. This was allowed to stir at rt for 24 h. The reaction was diluted with DCM (150 mL) and washed successively with sat. aq. NaHCO<sub>3</sub> (2 × 50 mL), 10% aq. HCl (2 × 50 mL), and sat. aq. NaCl (50 mL). The organic layer was then dried with anhydrous MgSO<sub>4</sub>, filtered and concentrated under reduced pressure. This was subjected to silica gel chromatography using (20% EA/80% hexanes) to yield lactone **13** as a white solid (1.39 g, 96%). mp = 200-201 °C; TLC R<sub>f</sub> = 0.51 (20% EA /80% hexanes); IR (neat) 2979, 1716, 1095, 1044 cm<sup>-1</sup>; <sup>1</sup>H NMR (300 MHz, CDCl<sub>3</sub>) δ 4.31 (dd, *J* = 12.7, 7.2 Hz, 1H), 3.98-3.80 (m, 4H), 3.60 (d, *J* = 12.7 Hz, 1H), 3.57-3.46 (m, 1H), 2.56 (t, *J* = 11.1 Hz, 1H), 2.36-2.21 (m, 1H), 2.00-1.76 (m, 5H), 1.75-1.58 (m, 3H), 1.56-1.48 (m, 2H), 1.45-1.24 (m, 4H), 1.23-1.05 (m, 2H), 1.03 (s, 3H), 0.88 (s, 9H), 0.84 (s, 3H), 0.05 (s, 6H); <sup>13</sup>C NMR (100 MHz, CDCl<sub>3</sub>) δ 176.5, 118.7, 70.9, 68.2, 65.2, 64.5, 47.2, 46.6, 44.7, 44.0, 42.3, 38.6, 37.6, 37.3, 33.5, 31.3, 29.2, 25.7, 24.7, 21.5, 18.2, 12.9, 13.4, -4.7. Anal calcd for C<sub>27</sub>H<sub>46</sub>O<sub>5</sub>Si: C, 67.74; H, 9.69 Found: C, 67.55; H, 9.52.

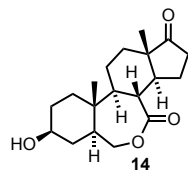

**((2*R*,5*S*,16*S*)-5-Hydroxy-2,16-dimethyl-9-oxatetracyclo[9.7.0.0<sup>2,7</sup>.0<sup>12,16</sup>]octadecane-15-one-10'-lactone (14).** Acetal **13** (0.200 g, 0.42 mmol) was suspended in 10 mL of methanol and 6.0 mL of 10% aq. HCl was added. This reaction mixture was allowed to stir at rt for 4 h. The reaction mixture was then concentrated and the residue diluted with EA (75 mL) and water (75 mL). The aqueous layer was extracted with EA (2 × 50 mL) and the combined organic layers were washed successively with sat. aq. NaHCO<sub>3</sub> (2 × 50 mL) and NaCl (1 × 50 mL). The organic layer was dried with anhydrous MgSO<sub>4</sub>, filtered and concentrated under reduced pressure. Purification of the residue by silica gel chromatography (80% EA/20% hexanes) yielded ketone **14** as a white solid (0.11 g, 82%). mp = 194-197 °C; TLC R<sub>f</sub> = 0.34 (100% EA); IR (neat) 3478, 1739, 1697 cm<sup>-1</sup>; <sup>1</sup>H NMR (400 MHz, CDCl<sub>3</sub>) δ 4.37 (q, *J* = 7.8 Hz, 1H),

3.67 (d,  $J = 13.1$  Hz, 1H), 3.64-3.56 (m, 1H), 2.74 (t,  $J = 10.7$  Hz, 1H), 2.51-2.38 (m, 1H), 2.26-2.00 (m, 3H), 1.99-1.86 (m, 2H), 1.86-1.72 (m, 3H), 1.66-1.56 (m, 2H), 1.51-1.22 (m, 6H), 1.13-1.02 (m, 1H), 1.06 (s, 3H), 0.86 (s, 3H);  $^{13}\text{C}$  NMR (100 MHz,  $\text{CDCl}_3$ )  $\delta$  219.7, 175.9, 69.9, 68.3, 47.2, 46.4, 45.9, 45.8, 41.6, 38.8, 37.2, 36.6, 35.4, 30.7, 30.3, 23.6, 21.6, 13.22, 13.19; Anal calcd for  $\text{C}_{18}\text{H}_{28}\text{O}_4$ : C, 71.22; H, 8.81. Found: C, 71.26; H, 8.64.

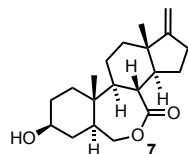

**(2*R*,5*S*,16*S*)-5-Hydroxy-2,16-dimethyl-15-methylene-9-oxatetracyclo[9.7.0.0<sup>2,7</sup>.0<sup>12,16</sup>]octadecan-10<sup>2</sup>-lactone (7).** Methyltriphenylphosphonium bromide (10.6 g, 29.6 mmol) was suspended in 56.7 mL dry THF under argon. *n*-BuLi (11.2 mL, 2.5 M, 28 mmol) was added dropwise to the stirring solution to generate the ylide. This stirred for 15 min at rt before being heated to 40°C. Ketone **14** (1.90 g, 5.93 mmol) was dissolved in 69.3 mL dry THF and added dropwise into the stirring reaction. The temperature was then increased to reflux. After 24 h the mixture was allowed to cool down to rt before water (75 mL) was added dropwise to quench the reaction. EA (100 mL) and more water (75 mL) were added and the layers separated. The aqueous phase was extracted with EA (2 × 100 mL). The combined organic extracts were washed with water (2 × 75 mL) and sat. aq. NaCl (2 × 75 mL), dried with anhydrous  $\text{MgSO}_4$ , filtered and concentrated. The residue was subjected to silica gel chromatography using (25%  $\text{Et}_2\text{O}/75\%$  EA) to yield alkene **6** as a white solid (1.28 g, 67%). TLC  $R_f = 0.51$  (100% EA); IR (neat) 3510, 3074, 1701, 1675  $\text{cm}^{-1}$ ;  $^1\text{H}$  NMR (400 MHz,  $\text{CDCl}_3$ )  $\delta$  4.65 (d,  $J = 8.9$  Hz, 2H), 4.33 (dd,  $J = 12.6, 7.8$  Hz, 1H), 3.68-3.50 (m, 2H), 2.59 (t,  $J = 10.8$  Hz, 1H), 2.52-2.39 (m, 1H), 2.37-2.22 (m, 1H), 2.11-2.01 (m, 1H), 1.98-1.67 (m, 7H), 1.66-1.46 (m, 2H), 1.44-1.12 (m, 5H), 1.03 (s, 4H), 0.76 (s, 3H);  $^{13}\text{C}$  NMR (100 MHz,  $\text{CDCl}_3$ )  $\delta$  177.0, 160.0, 101.8, 69.9, 68.2, 48.4, 47.1, 46.5, 42.0, 41.7, 38.7, 37.3, 36.6, 34.2, 30.7, 28.8, 26.1, 22.0, 17.9, 13.2. HRMS (ESI+) calcd for  $\text{C}_{20}\text{H}_{31}\text{O}_3$  ( $\text{M}+\text{H}^+$ ): 319.2273. Found: 319.2266.

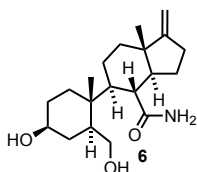

**(3*aS*,4*R*,5*S*,7*aS*)-5-[(1*R*,2*S*,4*S*)-4-Hydroxy-2-(hydroxymethyl)-1-methylcyclohexyl]-7*a*-methyl-1-methylene-2,3,3*a*,4,5,6,7,7*a*-octahydroindene-4-carboxamide (6).** A solution of ammonia in THF (5.3 mL, 0.5 M, 2.65 mmol) was cooled to -78°C. *n*-BuLi (1.0 mL, 2.5 M, 2.5 mmol) was added dropwise and allowed to stir for 30 min. Lactone **7** (0.169 g, 0.53 mmol) was dissolved in a solution of 2.0 mL dry THF and added dropwise into the reaction before allowing the reaction to warm to rt. The reaction continued for 24 h. The reaction was diluted with  $\text{NH}_4\text{Cl}$  (50 mL) and extracted successively with EA (2 × 75 mL). The combined organic extracts were washed with sat. aq. NaCl (2 × 50 mL). The organic layer was dried with anhydrous  $\text{MgSO}_4$ , filtered and concentrated. The residue was subjected to silica gel chromatography using (10% MeOH/90% EA) to yield amide **6** as a white solid (0.101 g, 57%). TLC  $R_f = 0.51$  (20% MeOH/80% EA); IR (neat) 3430, 3333, 3197, 2959, 2928, 1690, 1643, 1615, 1387, 1236, 1040, 1004  $\text{cm}^{-1}$ ;  $^1\text{H}$  NMR (300 MHz,  $\text{CD}_3\text{OD}$ )  $\delta$  4.69 (s, 2 H), 3.77 (dd,  $J = 10.7, 3.1$  Hz, 1 H), 3.55-3.39 (m, 1 H), 3.12 (t,  $J = 10.7$  Hz, 1 H), 2.59-2.46 (m, 1 H), 2.41 (t,  $J = 10.4$  Hz, 1 H), 2.34-2.07 (m, 2 H), 2.03-1.95 (m, 1 H), 1.94-1.74 (m, 4H), 1.73-1.55 (m, 3H), 1.54-1.30 (m, 6H), 0.97 (s, 3H), 0.84 (s, 3H);  $^{13}\text{C}$  NMR (75 MHz, MeOD)  $\delta$  181.2, 162.0, 102.5, 71.4, 62.6, 52.9, 46.1, 46.0, 44.3, 43.9, 39.0, 36.6, 35.1, 31.9, 31.5, 30.0, 26.2, 22.4, 19.9, 18.5. Anal calcd for  $\text{C}_{20}\text{H}_{33}\text{NO}_3$ : C, 71.60; H, 9.92; N, 4.18. Found: C, 71.20; H, 9.63; N, 4.28.

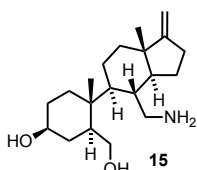

**(1S,3S,4R)-4-[(3aS,4R,5S,7aS)-4-(aminomethyl)-7a-methyl-1-methylene-2,3,3a,4,5,6,7,7a-octahydroinden-5-yl]-3-(hydroxymethyl)-4-methylcyclohexanol (15).** Amide **6** (0.350 g, 1.25 mmol) was dissolved in 12.0 mL of THF and cooled to 0 °C. A solution of LiAlH<sub>4</sub> (25.0 mL, 1.0 M in THF, 25 mmol) was added dropwise to the stirring solution. The temperature was increased to reflux for 20 h. The reaction was then cooled to rt and diluted with THF before being cooled to 0 °C. The reaction was then diluted with ethyl ether (50 mL) and quenched by the stepwise addition of 1 mL of water followed by 1 mL of 15% aq. NaOH followed by 3 mL of water. The white suspension was then filtered through celite, dried with MgSO<sub>4</sub>, filtered and concentrated. Purification of the residue via silica gel chromatography (10% MeOH/89% EA/1% sat. aq. NH<sub>4</sub>OH) yielded the amine **15** as a white gum (0.164 g, 49%). TLC *R<sub>f</sub>* = 0.23 (89% EA/10% MeOH/1% sat. aq. NH<sub>4</sub>OH); <sup>1</sup>H NMR (300 MHz, CD<sub>3</sub>OD) δ 4.65 (s, 2H), 3.75 (dd, *J* = 10.8, 2.2 Hz, 1H), 3.56-3.39 (m, 1H), 3.25-3.00 (m, 2H), 2.74 (d, *J* = 14.4 Hz, 1H), 2.63-2.43 (m, 1H), 2.42-2.24 (m, 1H), 2.32-2.10 (m, 1H), 1.94-1.74 (m, 5H), 1.74-1.21 (m, 10H), 1.11 (s, 3H), 0.84 (s, 3H); <sup>13</sup>C NMR (100 MHz, CDCl<sub>3</sub>) δ 161.2, 101.2, 70.2, 62.8, 49.9, 43.3, 41.9, 38.7, 37.1, 35.9, 34.4, 31.1, 30.7, 29.7, 29.1, 24.7, 23.2, 21.1, 18.3, 14.1.

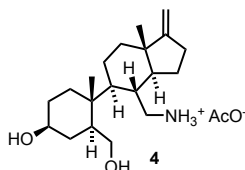

**(1S,3S,4R)-4-[(3aS,4R,5S,7aS)-4-(aminomethyl)-7a-methyl-1-methylene-2,3,3a,4,5,6,7,7a-octahydroinden-5-yl]-3-(hydroxymethyl)-4-methylcyclohexanol ammonium acetate AQX-1125 (4).** Amine **15** (0.100 g, 0.311 mmol) was dissolved in 5 mL 80% acetic acid and heated to 40 °C while stirring for 90 min. The reaction was then cooled to rt and 10 mL toluene was added. The solution was concentrated down 3 times with toluene and the residue was washed with diethyl ether 3× to yield amine salt **4** as a white solid (0.052 g, 43%). <sup>1</sup>H NMR (300 MHz, CD<sub>3</sub>OD) δ 4.69 (s, 2H), 3.73 (dd, *J* = 11.0, 2.6 Hz, 1H), 3.59-3.42 (m, 1H), 3.17 (t, *J* = 10.4 Hz, 1H), 3.06 (dd, *J* = 13.9, 2.8 Hz, 1H), 2.69-2.50 (m, 1H), 2.45-2.27 (m, 1H), 2.26-2.13 (m, 1H), 1.99-1.94 (m, 1H), 1.93 (s, 3H), 1.92-1.79 (m, 5H), 1.68-1.56 (m, 2H), 1.55-1.38 (m, 4H), 1.37-1.21 (m, 4H), 1.19 (s, 3H), 0.87 (s, 3H); <sup>13</sup>C NMR (75 MHz, CD<sub>3</sub>OD) δ 176.1, 161.7, 102.4, 71.0, 62.8, 51.2, 45.8, 45.0, 44.8, 42.6, 38.3, 37.3, 36.8, 35.2, 32.0, 30.0, 25.5, 24.1, 22.0, 21.4, 18.6. HRMS (ESI+) calcd for C<sub>20</sub>H<sub>36</sub>NO<sub>2</sub> 322.2741; Found 322.2740. Anal calcd for C<sub>22</sub>H<sub>39</sub>NO<sub>4</sub>: C, 69.25; H, 10.30; N, 3.61. Found: C, 69.28; H, 10.25; N, 3.30.

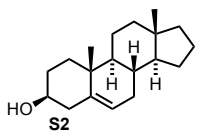

**5-Androsten-3β-ol (S2).** (This compound has been previously reported, see: Mori, K.; Nakayama, T.; Sakuma, M., Synthesis of some analogues of blattellastanoside A, the steroidal aggregation pheromone of the German cockroach. *Bioorg. Med. Chem.* **1996**, *4*, 401-408.) Potassium hydroxide (4.90 g, 86.7 mmol) was added to 25 mL diethylene glycol and heated until dissolved with a heat gun. Once the solution of KOH in diethylene glycol had cooled to rt, dehydroepiandrosterone (5.00 g, 17.3 mmol) and hydrazine hydrate (3.4 mL, 69.3 mmol) were added. With a reflux condenser attached the flask the solution was heated to 245 °C and refluxed for 24 h. The condenser was then removed and a short path distillation head was attached. The diethylene glycol was then mostly removed by

distillation. The reaction was then allowed to cool to rt and 100 mL MTBE and 100 mL sat. aq. NaCl were added. The mixture stirred overnight. The aqueous phase was then separated and extracted with MTBE (10 × 60 mL). The combined organic extracts were washed with sat. aq. NaCl (5 × 60 mL), dried with sodium sulfate, filtered and concentrated. Silica gel chromatography (30% EA/70% hexanes) yielded alcohol **S2** as a white colored solid (4.59 g, 96%). mp = 117-120 °C; TLC  $R_f$  = 0.24 (30% EA /70% hexanes);  $^1\text{H}$  NMR (400 MHz,  $\text{CDCl}_3$ )  $\delta$  5.38-5.37 (m, 1H), 3.58-3.50 (m, 1H), 2.35-2.21 (m, 2H), 2.08-1.99 (m, 1H), 1.90-1.82 (m, 2H), 1.79-1.73 (m, 1H), 1.72-1.38 (m, 10H), 1.24-1.05 (m, 4H), 1.04 (s, 3H), 1.01-0.88 (m, 2H), 0.74 (s, 3H);  $^{13}\text{C}$  NMR (100 MHz,  $\text{CDCl}_3$ )  $\delta$  140.8, 121.7, 71.8, 54.9, 50.4, 42.3, 40.6, 40.3, 38.7, 37.4, 36.7, 32.2, 32.1, 231.7, 25.6, 21.1, 20.5, 19.4, 17.3.

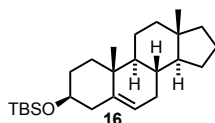

**5-Androsten-3 $\beta$ -ol- tert-butyltrimethylsilyl ether (16).** Alcohol **S2** (3.64 g, 13.3 mmol) was added to a 250 mL flame dried round-bottom flask. 44 mL of DMF and 44 mL of DCM were added to dissolve the alcohol. Imidazole (2.21 g, 32.5 mmol) and tert-butyl(chloro)dimethylsilane (3.10 g, 20.6 mmol) were then added to the reaction. This reaction mixture was allowed to stir at rt for 20 h under argon. The excess solvent was then removed under reduced pressure. The remaining contents were diluted with diethyl ether (150 mL) and washed successively with 5% aq. HCl (2 × 75 mL), sat. aq.  $\text{NaHCO}_3$  (2 × 75 mL) and sat. aq. NaCl (75 mL). The organic layer was dried with anhydrous  $\text{Na}_2\text{SO}_4$ , filtered and concentrated to yield the silyl ether **16** as a white colored solid (4.67 g, 91%). mp = 118-119 °C; TLC  $R_f$  = 0.89 (10% EA/90% hexanes); IR (neat) 2952, 1091  $\text{cm}^{-1}$ ;  $^1\text{H}$  NMR (400 MHz,  $\text{CDCl}_3$ )  $\delta$  5.32 (d,  $J$  = 5.1, 1H), 3.48 (sep,  $J$  = 4.6 Hz, 1H), 2.32-2.22 (m, 1H), 2.17 (ddd,  $J$  = 13.1, 4.9, 2.1 Hz, 1H), 2.06-1.96 (m, 1H), 1.82 (dt,  $J$  = 16.7, 3.5 Hz, 1H), 1.78-1.62 (m, 4H), 1.61-1.55 (m, 2H), 1.54-1.50 (m, 2H), 1.49-1.34 (m, 3H), 1.27-1.10 (m, 3H), 1.09-1.03 (dd,  $J$  = 13.6, 3.7, 1H), 1.01 (s, 3H), 0.99-0.92 (dd,  $J$  = 11.8, 5.2, 1H), 0.91-0.86 (m, 10H), 0.71 (s, 3H), 0.06 (s, 6H);  $^{13}\text{C}$  NMR (100 MHz,  $\text{CDCl}_3$ )  $\delta$  141.6, 121.2, 72.7, 54.9, 50.5, 42.8, 40.6, 40.3, 38.8, 37.5, 36.8, 32.3, 32.2, 32.1, 25.9, 25.6, 21.1, 20.5, 19.5, 18.3, 17.3, -4.6. Anal calcd for  $\text{C}_{25}\text{H}_{44}\text{OSi}$ : C, 77.25; H, 11.41. Found: C, 76.91, H, 11.54.

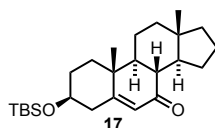

**5-Androsten-7-one-3 $\beta$ -ol tert-butyltrimethylsilyl ether (17).** Alkene **16** (0.250 g, 0.64 mmol) was added to an oven dried test tube along with bis[rhodium( $\alpha,\alpha,\alpha',\alpha'$ -tetramethyl-1,3-benzenedipropionic acid)] (0.005 g, 0.0064 mmol). The solids were dissolved in n-heptanes (2 mL) and 70 wt % tert-butyl hydroperoxide (0.40 mL, 3.2 mmol) was added slowly. The test tube was equipped with a purge needle and allowed to stir at room temperature for 16 h. After stirring for 16 h the reaction mixture was diluted with EA (5 mL) and was quenched with a sat. aq. sodium thiosulfate solution (10 mL). The organic layer was separated and subsequently washed with deionized water (2 × 5 mL). The combined aqueous layers were extracted once more with EA (5 mL). The combined organic extracts were dried over sodium sulfate, filtered and concentrated. Purification by silica gel chromatography (10% EA/hexanes) provided enone **17** as a white solid (0.124 g, 48% yield). mp = 147-149 °C; TLC  $R_f$  = 0.89 (100% hexanes); IR (ATR) 2938, 1656, 1058  $\text{cm}^{-1}$ ;  $^1\text{H}$  NMR (400 MHz,  $\text{CDCl}_3$ )  $\delta$  5.68 (d,  $J$  = 1.34, 1H), 3.60 (sep,  $J$  = 15.8, 10.3, 5.5, 1H), 2.57-2.31 (m, 3H), 2.19 (t,  $J$  = 11.2, 1H), 1.92 (dt,  $J$  = 13.7, 3.5 Hz, 1H), 1.86-1.78 (m, 1H), 1.74 (dt,  $J$  = 13.0, 3.3 Hz, 1H), 1.69-1.64 (m, 2H), 1.63-1.57 (m, 3H), 1.55-1.47 (m, 2H), 1.46-1.28 (m, 2H), 1.27-1.21 (m, 1H), 1.19 (s, 3H), 1.17-1.07 (m, 2H), 0.89 (s, 9H), 0.72 (s, 3H), 0.66 (s, 6H);  $^{13}\text{C}$  NMR (100 MHz,  $\text{CDCl}_3$ )  $\delta$  202.3, 166.2, 125.7, 71.3, 50.3, 48.1, 45.8, 42.6, 41.3, 39.2, 38.5, 37.8, 36.5, 31.8, 27.6,



25.8, 21.3, 20.6, 18.1, 17.3, 17.2, -4.6. Anal calcd for C<sub>25</sub>H<sub>42</sub>O<sub>2</sub>Si: C, 74.57; H, 10.51. Found: C, 74.62; H, 10.42.

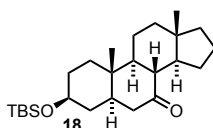

**5-Androsta-7-one-3β-ol tert-butyldimethylsilyl ether (18).** Enone **17** (2.25 g, 5.58 mmol) was dissolved in 154 mL of EA. 10% Pd/C (0.26 g, 0.244 mmol, ~4 mol %) was added to the reaction. The atmosphere above the suspension was removed and replaced with hydrogen gas from a balloon. This was allowed to stir for 20 h at rt. The reaction was then filtered through celite, rinsing with EA. Concentration under reduced pressure provided ketone **18** as a white solid (2.14 g, 95%). mp = 104-105 °C; TLC R<sub>f</sub> = 0.67 (15% EA/85% hexanes); IR (neat) 2929, 1707, 1096 cm<sup>-1</sup>; <sup>1</sup>H NMR (400 MHz, CDCl<sub>3</sub>) 3.55 (septet, *J* = 15.1, 10.5, 4.2 Hz, 1H), 2.44-2.18 (m, 3H), 2.07-1.95 (m, 1H), 1.78-1.68 (m, 3H), 1.67-1.57 (m, 3H), 1.54-1.37 (m, 6H), 1.36-1.21 (m, 2H), 1.20-1.10 (m, 2H), 1.08 (s, 3H), 1.07-0.92 (m, 2H), 0.88 (s, 9H), 0.68 (s, 3H), 0.04 (s, 6H); <sup>13</sup>C NMR (100 MHz, CDCl<sub>3</sub>) δ 212.3, 71.5, 55.8, 50.4, 47.0, 46.9, 46.1, 40.8, 39.4, 38.5, 37.8, 36.3, 36.1, 31.6, 26.3, 25.9, 21.9, 20.6, 18.2, 17.4, 11.9, -4.6. Anal calcd for C<sub>25</sub>H<sub>44</sub>O<sub>2</sub>Si: C, 74.20; H, 10.96. Found: C, 74.08; H, 10.84.

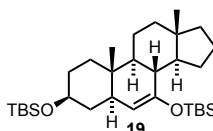

**5-Androsta-7-tert-butyldimethyl oxysilane-3β-ol tert-butyldimethylsilyl ether (19).** Ketone **18** (0.76 g, 1.87 mmol) was dissolved in 15.3 mL of DCM. The solution was cooled to 0 °C and triethylamine (10.2 mL, 74.0 mmol) was added. The mixture was allowed to stir at this temperature for 15 min. *tert*-Butyldimethylsilyl trifluoromethanesulfonate (2.15 mL, 9.37 mmol) was then added to the reaction, maintaining the temperature at 0 °C. This reaction mixture was then allowed to warm to rt and stirred for 20 h under argon. The mixture was re-cooled to 0 °C and isopropyl alcohol (1.1 mL) was then added. DCM (100 mL) and sat. aq. NaHCO<sub>3</sub> (50 mL) were then added, and the organic phase was separated. The aqueous phase was extracted 2× with DCM (100 mL) and the combined organics washed with sat. aq. NaHCO<sub>3</sub> (1 × 50 mL) followed by sat. aq. NaCl (1 × 50 mL). The organic layer was then dried over MgSO<sub>4</sub>, filtered and concentrated. Purification by silica gel chromatography (1% EA/99% hexanes) gave silyl enol ether **19** as a pale yellow colored solid (0.85 g, 87%). mp = 105-109 °C; TLC R<sub>f</sub> = 0.58 (1% EA/99% hexanes); IR (neat) 2928, 1082 cm<sup>-1</sup>; <sup>1</sup>H NMR (400 MHz, CDCl<sub>3</sub>) δ 4.41 (s, 1H), 3.59 (septet, *J* = 15.3, 10.5, 5.3 Hz, 1H), 1.98-1.78 (m, 3H), 1.77-1.68 (m, 2H), 1.67-1.56 (m, 3H), 1.52-1.45 (m, 2H), 1.44-1.18 (m, 5H), 1.17-0.96 (m, 5H), 0.92 (s, 9H), 0.89 (s, 9H), 0.74 (s, 3H), 0.73 (s, 3H), 0.13 (s, 3H), 0.11 (s, 3H), 0.06 (bs, 6H); <sup>13</sup>C NMR (100 MHz, CDCl<sub>3</sub>) δ 152.6, 108.5, 72.2, 54.6, 52.4, 43.6, 42.5, 42.3, 39.8, 39.4, 37.4, 34.9, 34.3, 31.9, 28.5, 26.0, 25.9, 21.5, 20.8, 18.2, 18.0, 11.3, -3.9, -4.2, -4.5 (2C). HRMS (ESI+) calcd for C<sub>31</sub>H<sub>58</sub>O<sub>2</sub>Si<sub>2</sub>+H<sup>+</sup> [*M*+H<sup>+</sup>]: 519.4054; Found 519.4050.

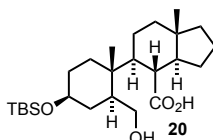

**(7a*S*)-5-[(1*R*,4*S*)-4-((*tert*-butyldimethylsilyl)oxy)-1-methylcyclohexyl]-7a-methylperhydro-1*H*-indene-4-carboxylic acid (20).** Silyl enol ether **19** (1.30 g, 2.50 mmol) was dissolved in methanol (40 mL) and DCM (40 mL). The solution was cooled to -78 °C and O<sub>3</sub> gas was bubbled through the solution until it turned blue. After purging with argon, the blue color dissipated. The mixture was warmed to 0 °C and sodium borohydride (0.38 g, 10.0 mmol) was added. The reaction mixture was then allowed to warm

to rt and stirred for 20 h. More NaBH<sub>4</sub> (0.38 g, 10.0 mmol) was then added. After 3 h the solvent was mostly removed on a rotary evaporator. DCM was added (50 mL) and water (50 mL) were then added to the residue. The DCM layer was separated and the aqueous layer extracted with DCM (3 × 50 mL). The organic layers were combined and washed with sat. aq. NaCl (2 × 50 mL). The organic layer was dried with anhydrous MgSO<sub>4</sub>, filtered and concentrated to provide acid **20** as a cream colored foam (0.659 g, 60%). mp = 140-143 °C; TLC R<sub>f</sub> = 0.49 (10% MeOH/ 90% DCM); IR (neat) 3314, 2932, 1669, 1245, 1209, 1100, 1067, 960, 831 cm<sup>-1</sup>; <sup>1</sup>H NMR (400 MHz, CDCl<sub>3</sub>) δ 3.75 (dd, *J* = 10.8, 3.2 Hz, 1H), 3.58-3.48 (m, 1H), 3.09 (t, *J* = 10.4 Hz, 1H), 2.24 (t, *J* = 11.2 Hz, 1H), 2.09-2.05 (m, 1H), 1.96-1.89 (m, 1H), 1.79-1.38 (m, 13H), 1.34-1.18 (m, 4H), 0.90 (s, 12H), 0.72 (s, 3H), 0.08 (s, 6H); <sup>13</sup>C NMR (100 MHz, CDCl<sub>3</sub>) δ 180.0, 71.6, 61.0, 51.5, 46.0, 44.8, 42.3, 39.6, 39.4, 38.0, 37.2, 34.3, 31.2, 30.0, 25.8, 25.0, 20.9, 19.6, 18.3, 17.6, 15.6, -5.8. HRMS (ESI+) calcd for C<sub>25</sub>H<sub>46</sub>NaO<sub>4</sub>Si 461.3057; Found: 461.3053.

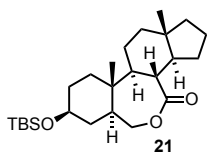

**(2R,5S,16S)-5-((tert-butyldimethylsilyloxy)-2,16-dimethyl-9-oxatetracyclo[9.7.0.0<sup>2,7</sup>.0<sup>12,16</sup>]octadecan-10-lactone (21).** Carboxylic acid **20** (0.27 g, 0.62 mmol) was dissolved in 9.2 mL of DCM followed by the addition of DMAP (0.015 g, 0.12 mmol). After stirring for 5 minutes, 1-ethyl-3-(3-dimethylaminopropyl)carbodiimide (0.19 g, 1.23 mmol) was then added. This was allowed to stir at rt for 24 h. The reaction was diluted with DCM (75 mL) and washed successively with sat. aq. NaHCO<sub>3</sub> (2 × 25 mL), 10% aq. HCl (2 × 25 mL), and sat. aq. NaCl (25 mL). The organic layer was dried with anhydrous MgSO<sub>4</sub> and solvent removed under reduced pressure. This was subjected to silica gel chromatography using (20% EA/80% hexanes) to yield protected lactone **21** as a white solid (0.24 g, 92%). TLC R<sub>f</sub> = 0.42 (10% EA/90% hexanes); IR (neat) 2972, 1732, 1093 cm<sup>-1</sup>; <sup>1</sup>H NMR (400 MHz, CDCl<sub>3</sub>) δ 4.33 (dd, *J* = 12.9, 7.5 Hz, 1H), 3.61 (d, *J* = 12.8 Hz, 1H), 3.53 (septet, *J* = 15.4, 10.7, 4.7 Hz, 1H), 2.50 (t, *J* = 11.1 Hz, 1H), 1.95-1.83 (m, 2H), 1.82-1.74 (m, 2H), 1.73-1.60 (m, 5H), 1.52-1.15 (m, 8H), 1.12-1.05 (m, 1H), 1.03 (s, 3H), 1.02-0.97 (m, 1H), 0.87 (s, 9H), 0.71 (s, 3H), 0.05 (s, 6H); <sup>13</sup>C NMR (100 MHz, CDCl<sub>3</sub>) δ 177.6, 70.9, 68.3, 48.5, 47.4, 46.7, 41.9, 39.8, 38.7, 38.7, 37.5, 37.3, 37.2, 31.3, 27.5, 25.9, 22.2, 19.9, 18.2, 16.7, 13.3, -4.7. HRMS (ESI+) calcd for C<sub>25</sub>H<sub>44</sub>O<sub>3</sub>Si:420.3060; Found: 420.3054.

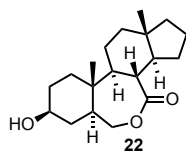

**(2R,5S,16S)-5-Hydroxy-2,16-dimethyl-9-oxatetracyclo[9.7.0.0<sup>2,7</sup>.0<sup>12,16</sup>]octadecan-10-one (22).** Lactone **21** (0.19 g, 0.19 mmol) was added to a 100 mL flame dried round-bottom flask. 5.0 mL of methanol and 6.0 mL of 10% aq. HCl was added to reaction. The reaction mixture was allowed to stir at rt for 4 h. The solution was concentrated down and the contents diluted with EA (50 mL) and water (50 mL). The aqueous phase was extracted with EA (2 × 50 mL) and the collected organic was washed successively with sat. aq. NaHCO<sub>3</sub> (2 × 25 mL) and sat. aq. NaCl (1 × 25 mL). The organic layer was then dried with anhydrous MgSO<sub>4</sub> and the solvent was removed under reduced pressure. Purification through silica gel chromatography (80% EA/ 20% hexanes) yielded lactone **22** as a white colored solid (0.123 g, 89%). mp = 126-129 °C; TLC R<sub>f</sub> = 0.42 (50% EA/ 50% hexanes); IR (neat) 3276, 1733, 1032 cm<sup>-1</sup>; <sup>1</sup>H NMR (300 MHz, CDCl<sub>3</sub>) δ 4.34 (dd, *J* = 12.9, 7.9 Hz, 1H), 3.67-3.49 (m, 2 H), (t, *J* = 10.6 Hz, 1H), 1.96-1.86 (m, 2H), 1.85-1.72 (m, 5H), 1.70-1.58 (m, 4H), 1.53-1.41 (m, 2H), 1.40-1.13 (m, 6H), 1.13-1.10 (m, 1H), 1.07 (s, 3 H), 0.71 (s, 3H); <sup>13</sup>C NMR (100 MHz, CDCl<sub>3</sub>) δ 177.4, 70.1, 68.2, 48.5, 47.2, 46.5, 41.8,

39.8, 38.7 (2C), 37.3, 37.2, 36.7, 30.8, 27.5, 22.2, 19.9, 16.7, 13.2. HRMS (ESI+) calcd for C<sub>19</sub>H<sub>30</sub>O<sub>3</sub> 306.2195; Found: 306.2195.

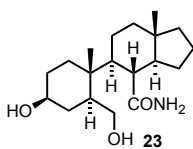

**(7a*S*)-5-[(1*R*,4*S*)-4-Hydroxy-2-(hydroxymethyl)-1-methylcyclohexyl]-7a-methylperhydro-1*H*-indene-4-carboxamide (23).** A solution of ammonia in THF (9.12 mL, 0.5 M) was cooled to -78 °C in a dry ice / acetone bath. *n*-BuLi (1.7 mL, 2.5 M) was added dropwise and allowed to stir for 30 min. Lactone **22** (0.350 g, 1.14 mmol) was dissolved in a solution of 5 mL THF and added dropwise into the reaction before allowing the reaction to warm to rt. The reaction continued for 24 h. The reaction was diluted with sat. aq. NH<sub>4</sub>Cl (20 mL) and extracted successively with EA (2 × 25 mL). The collected organic extracts were washed with saturated NaCl (25 mL). The organic layer was dried with anhydrous MgSO<sub>4</sub> and solvent removed under reduced pressure. This was subjected to silica gel chromatography using (90% EA/10% MeOH) to yield amide **23** as a white solid (0.195 g, 53%). TLC *R*<sub>f</sub> = 0.45 (90% EA /10% MeOH); IR (neat) 3333, 3196, 1651 cm<sup>-1</sup>; <sup>1</sup>H NMR (300 MHz, CD<sub>3</sub>OD) δ 3.65 (d, *J* = 10.8 Hz, 1H), 3.37-3.28 (m, 1H), 3.00 (t, *J* = 10.2 Hz, 1H), 2.16 (t, *J* = 10.5 Hz, 1H), 2.02 (d, *J* = 13.2 Hz, 1H), 1.82-1.91 (m, 1H), 1.68-1.06 (m, 17H), 0.84 (s, 3H), 0.65 (s, 3H); <sup>13</sup>C NMR (75 MHz, CDCl<sub>3</sub>) δ 180.9, 69.9, 61.1, 51.2, 44.7, 44.6, 42.4, 39.8, 39.4, 38.1, 37.4, 33.5, 30.4, 29.9, 26.1, 21.0, 19.6, 18.3, 15.8. HRMS (ESI+) calcd for C<sub>19</sub>H<sub>33</sub>NO<sub>3</sub>: 323.2460; Found 323.2456.

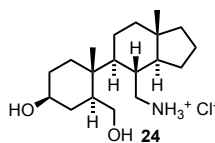

**(1*S*,4*R*)-4-[(7a*S*)-4-(Aminomethyl)-7a-methylperhydro-1*H*-inden-5-yl]-3-(hydroxymethyl)-4-methylcyclohexanol ammonium chloride (24).** Amide **23** (0.100 g, 0.31 mmol) was dissolved in 3.0 mL of dry THF and cooled to 0 °C. LiAlH<sub>4</sub> (4.64 mL, 1.0 M in THF) was added dropwise to the stirring solution. The temperature was increased to reflux for 20 h. The reaction was cooled to rt and diluted with THF before being cooled to 0 °C. Fieser method was used to work up the reaction. The filtered product was dried with MgSO<sub>4</sub> and concentrated down to give the crude amine. Purification through silica gel chromatography (9% methanol: 90% EA: 1% NH<sub>4</sub>OH) yield the amine **S3** as a clear oil (0.033 g). This was dissolved in 3.0 mL of Et<sub>2</sub>O and HCl (g) was bubbled into the solution at rt for 15 min. The solution was then concentrated and the residue was washed with diethyl ether (2×) to yield the amine hydrochloride salt **24** as a white solid (0.019 g, 29%). IR (neat) 3310, 2929, 1612, 1378, 1036, 1003, 951, 732 cm<sup>-1</sup>; <sup>1</sup>H NMR (300 MHz, MeOD) δ 3.71 (dd, *J* = 11.0, 2.5 Hz, 1H), 3.45-3.35 (m, 1H), 3.21-3.00 (m, 2H), 2.15 (d, *J* = 12.3 Hz, 1H), 1.91-1.67 (m, 8H), 1.63-1.38 (m, 6H), 1.36-1.18 (m, 6H), 1.07 (s, 3H), 0.78 (s, 3H); <sup>13</sup>C NMR (75 MHz, MeOD) δ 70.8, 62.6, 51.0, 45.6, 46.6, 43.0, 41.6, 41.2, 39.6, 38.1, 37.4, 35.0, 31.9, 26.8, 24.0, 21.9, 21.1, 17.3, 15.4. HRMS (ESI+) calcd for C<sub>19</sub>H<sub>35</sub>NO<sub>2</sub>: 309.2668; Found: 309.2671.

### **Malachite Green Phosphatase Release Assays.**

Malachite Green Phosphatase Release Assays (Echelon Biosciences) were performed with recombinant human truncated SHIP1 (tSHIP1)(see Brooks, R.; Iyer, S.; Akada, H.; Neelam, S.; Russo, C. M.; Chisholm, J. D.; Kerr, W. G. *Stem Cells* **2015**, *33*, 848-58. doi:10.1002/stem.1902). Briefly, serial dilutions of the compounds dissolved in DMSO were added to the recombinant enzymes diluted in reaction buffer Rx (50mM HEPES pH 7.4, 150mM NaCl, 1mM MgCl<sub>2</sub>, 0.25mM EDTA) in triplicate reactions in 96-well plates. Reactions were incubated at 37 °C for 30 min. 2.5 mL of 1mM Phosphatidylinositol 3,4,5-trisphosphate diC8 (PI(3,4,5)P<sub>3</sub>diC8) (Echelon Biosciences) was added to each

reaction to a final concentration of 100 $\mu$ M in a final volume of 25 mL /well. Following 20 min incubation at 37°C, 100 $\mu$ L of Malachite Green Solution (Echelon Biosciences) was added to each well and plates were incubated at room temperature in the dark for 15 min. Plates were then read at 620nm on a plate reader (Synergy 2, BioTek). Mean  $\pm$  SEM of enzymatic activity is expressed as % of solvent alone control (5% DMSO). Data was pooled from triplicate wells from 4 independent experiments.

#### **Cell Viability Assay**

OPM-2 cells (DSMZ) were seeded 4x10<sup>5</sup>cells/ml in media (10%FBS:DMEM) in 96-well plates and incubated with dilutions of 3AC (in 1% EtOH final) or AQX-1125 (in DMSO 1% final) at 37 °C, 5% CO<sub>2</sub>. After 24 h incubation, 10ul of Cell Counting Kit-8 solution (CCK-8, Dojindo Molecular Technologies, Inc.) was added, incubation was continued for 2h at 37°C and O.D.450nm was measured on a Bio-Tek Synergy 2 plate reader. Cell viability is expressed as % of vehicle treated cells (compound concentration 0). Data were pooled from at least 4-well replicates from 3 independent experiments, and were analyzed with 1-way Analysis of Variance (ANOVA) in GraphPad Prizm 9.

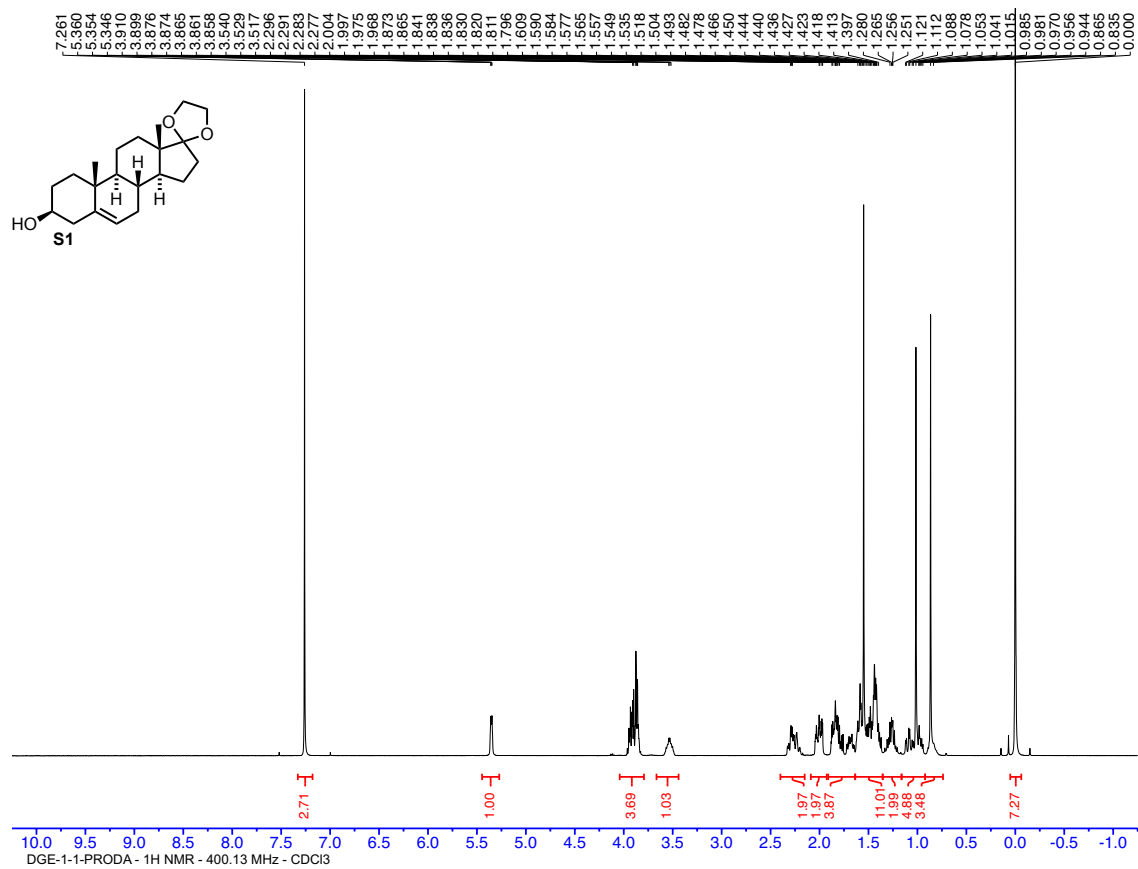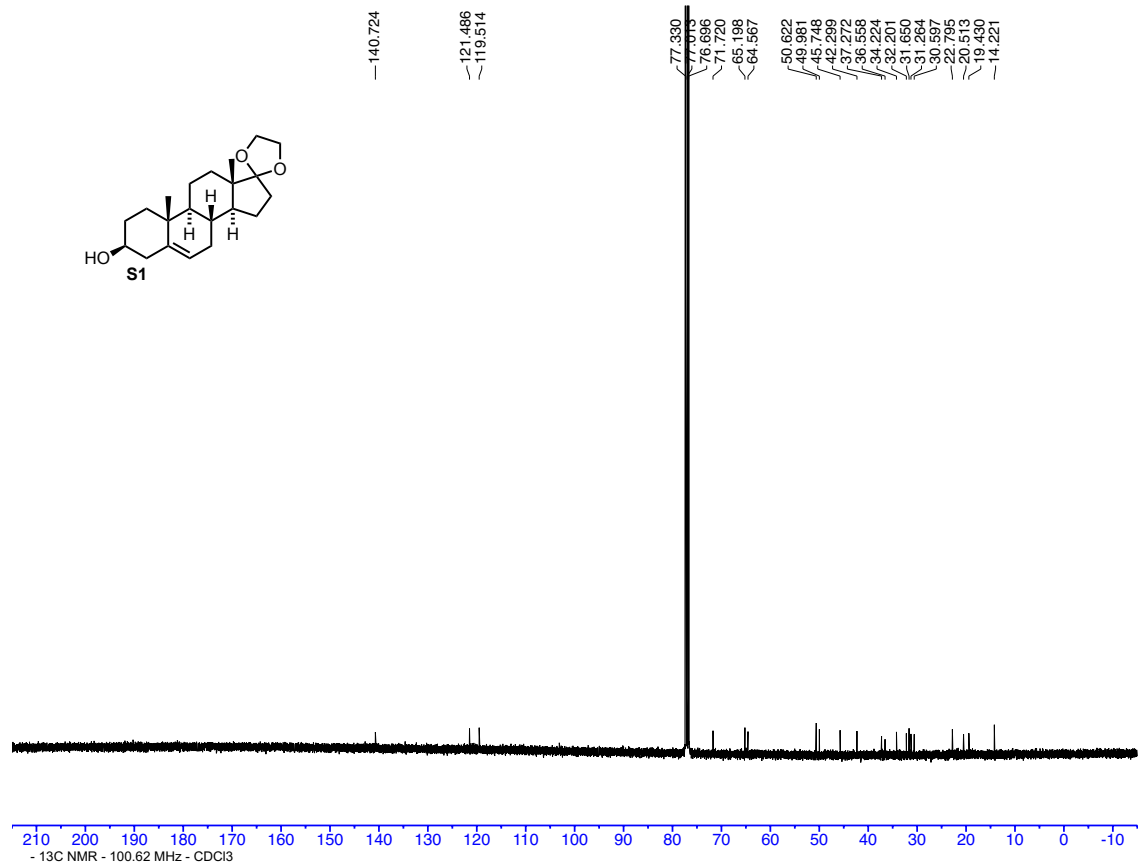

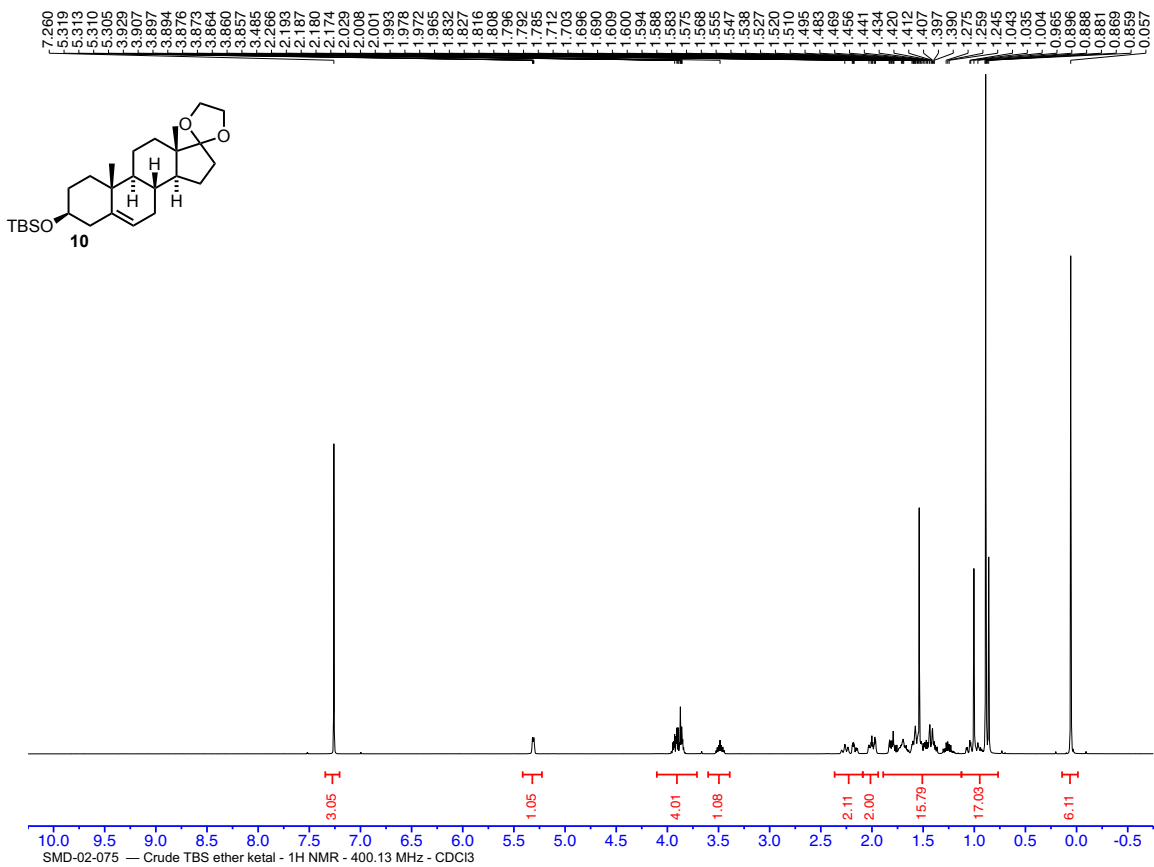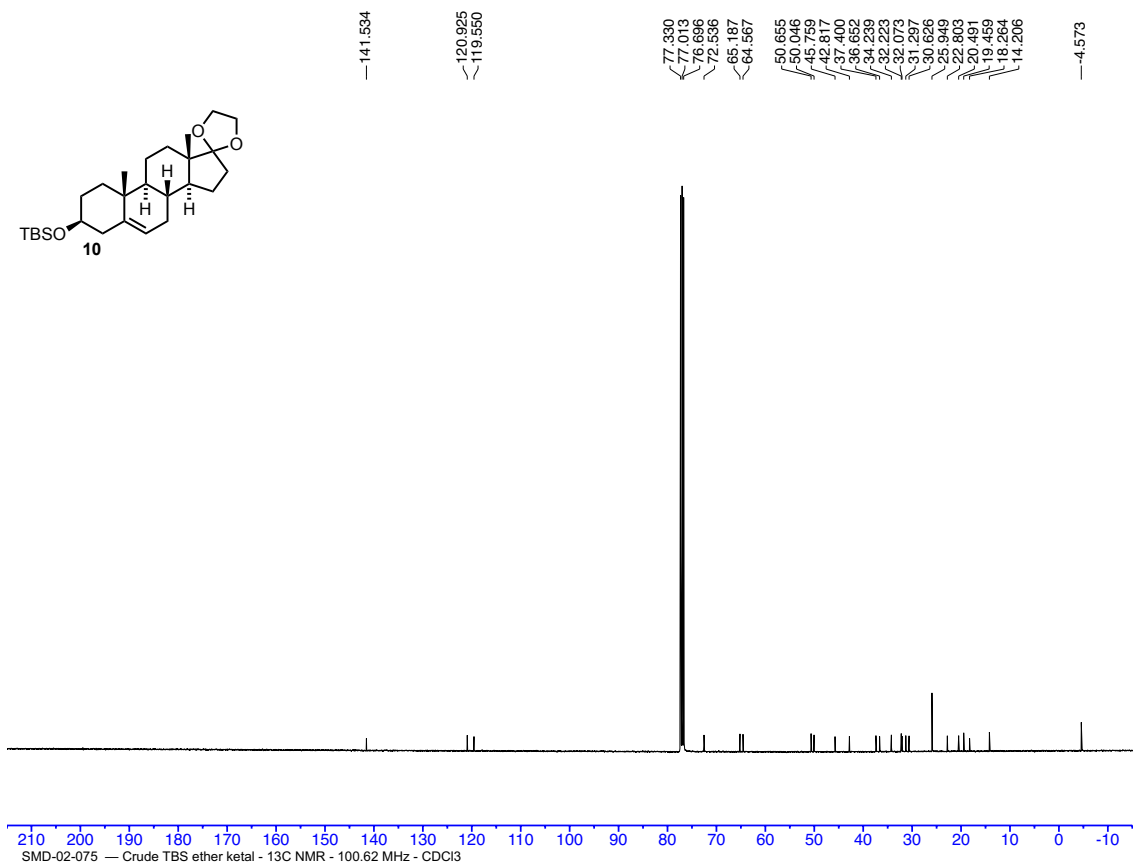

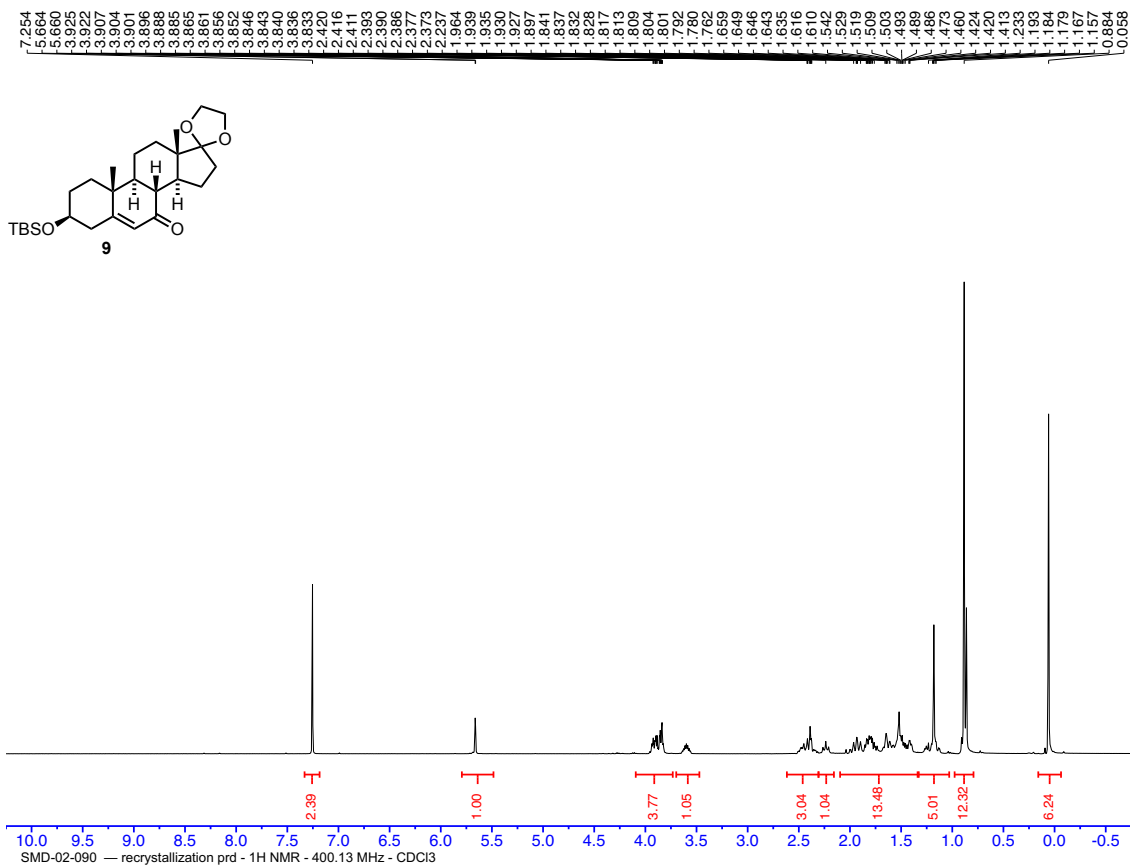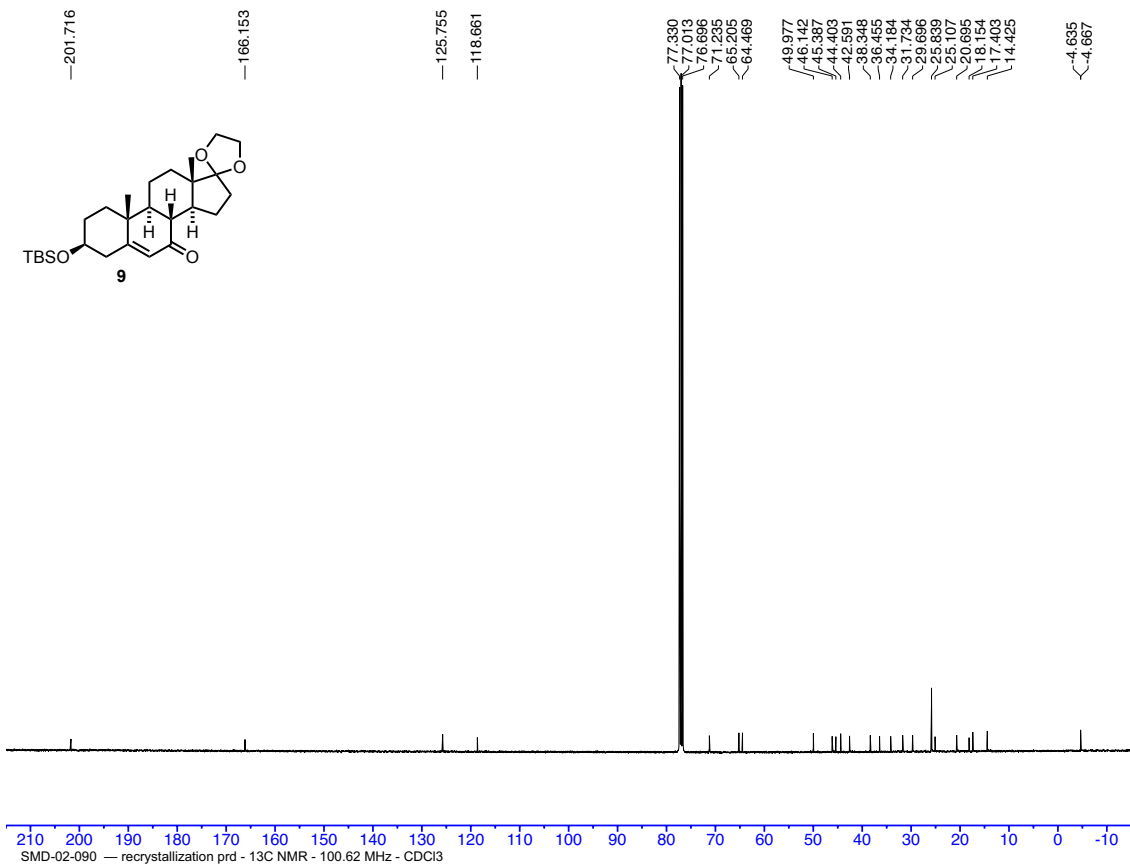

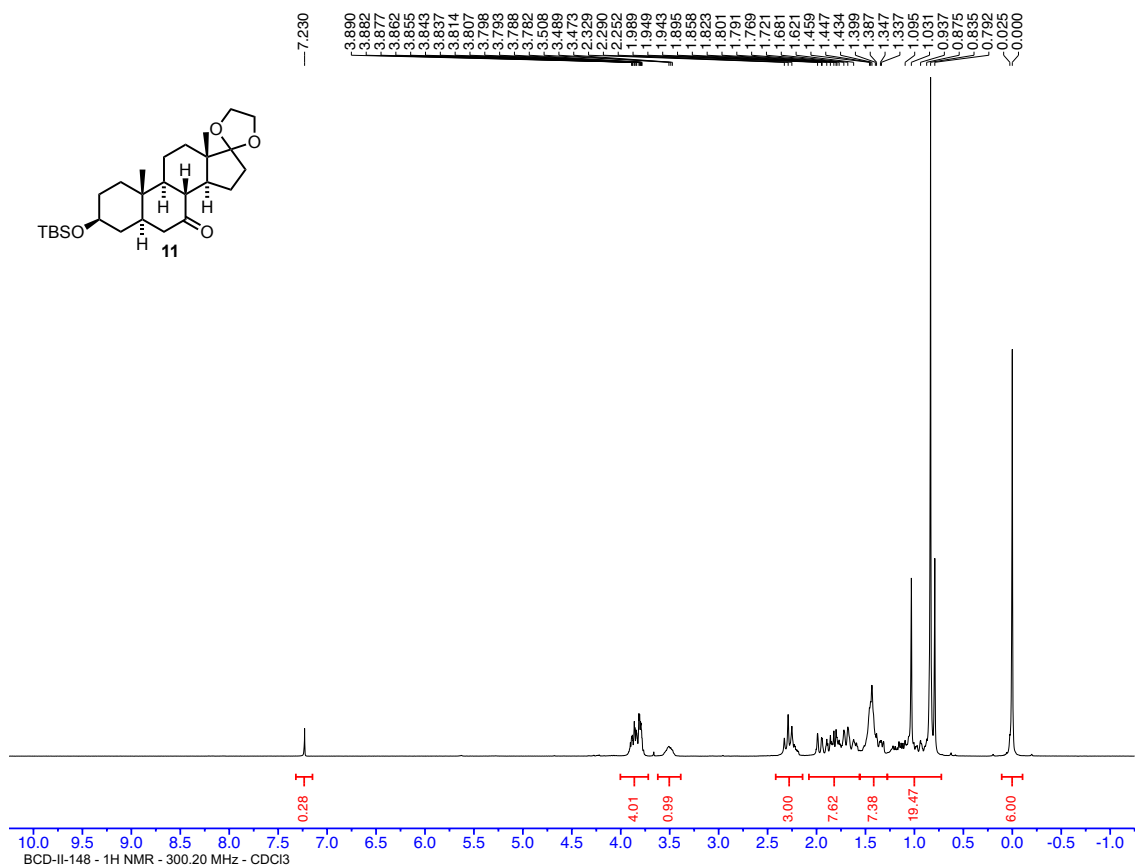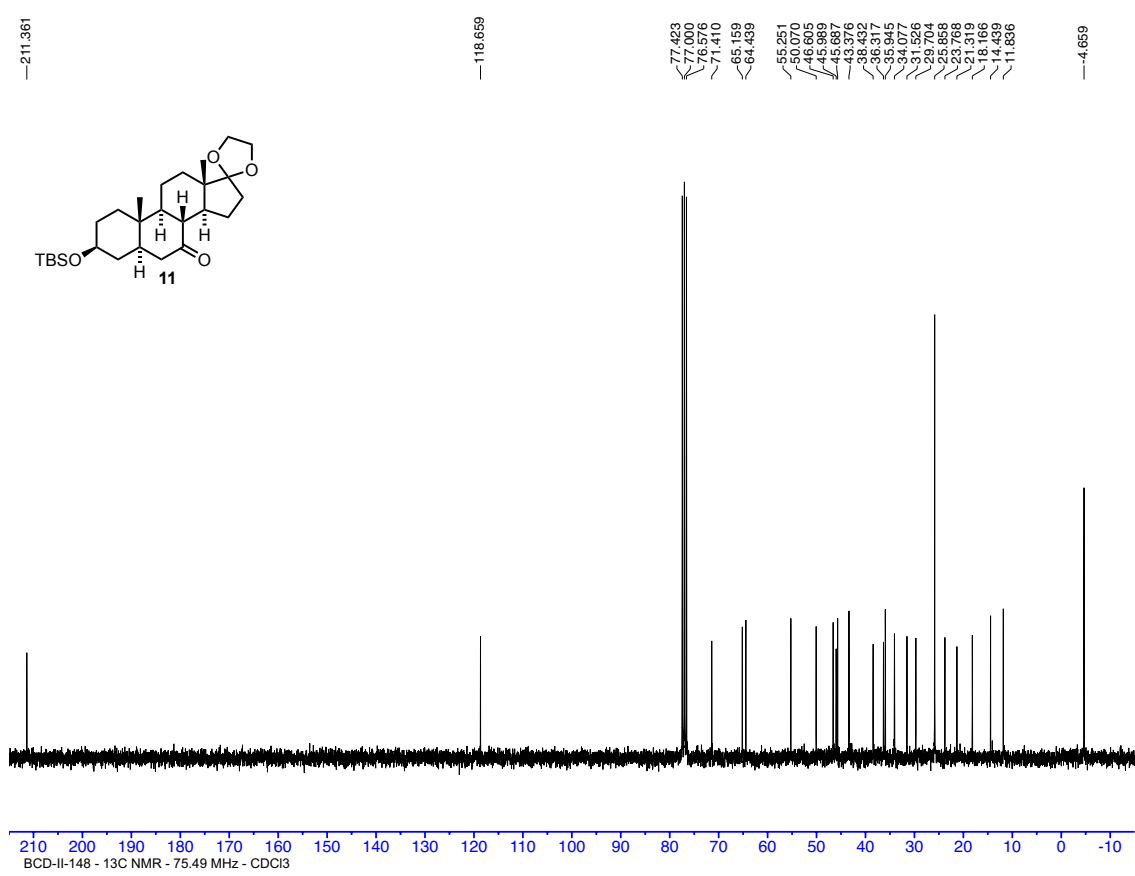



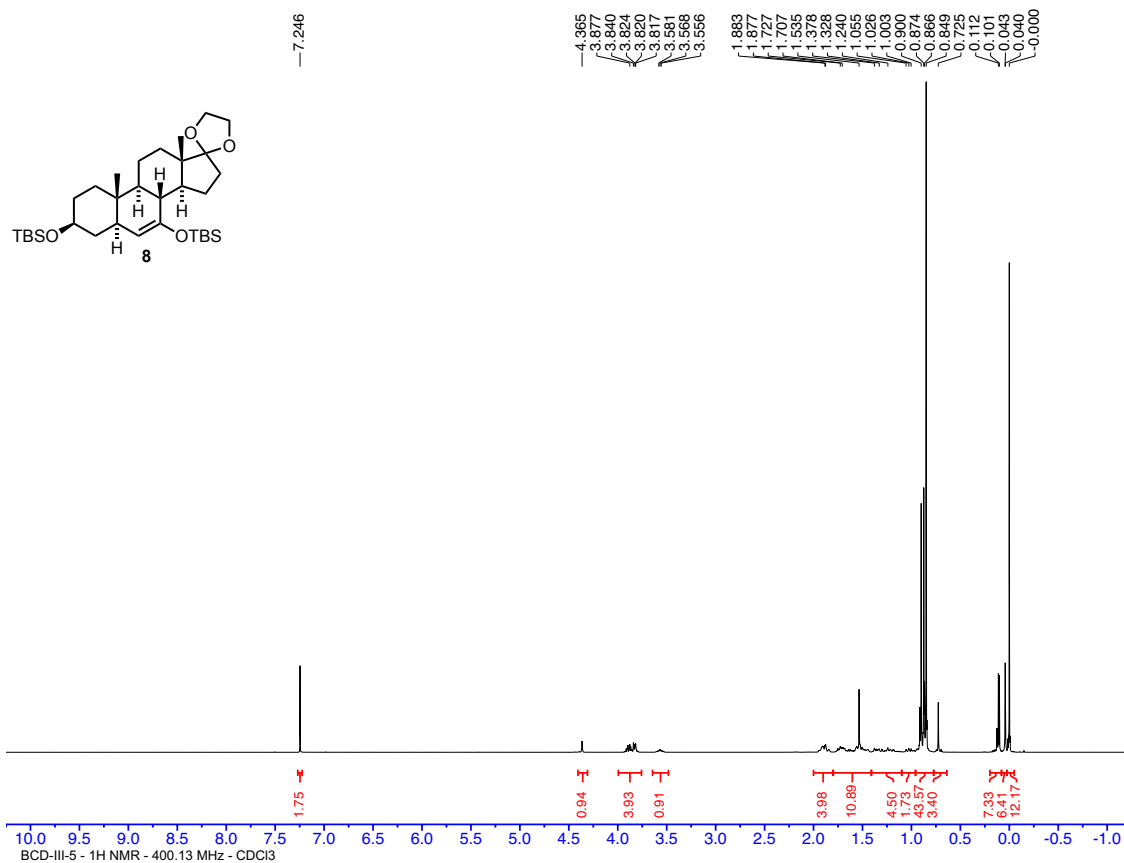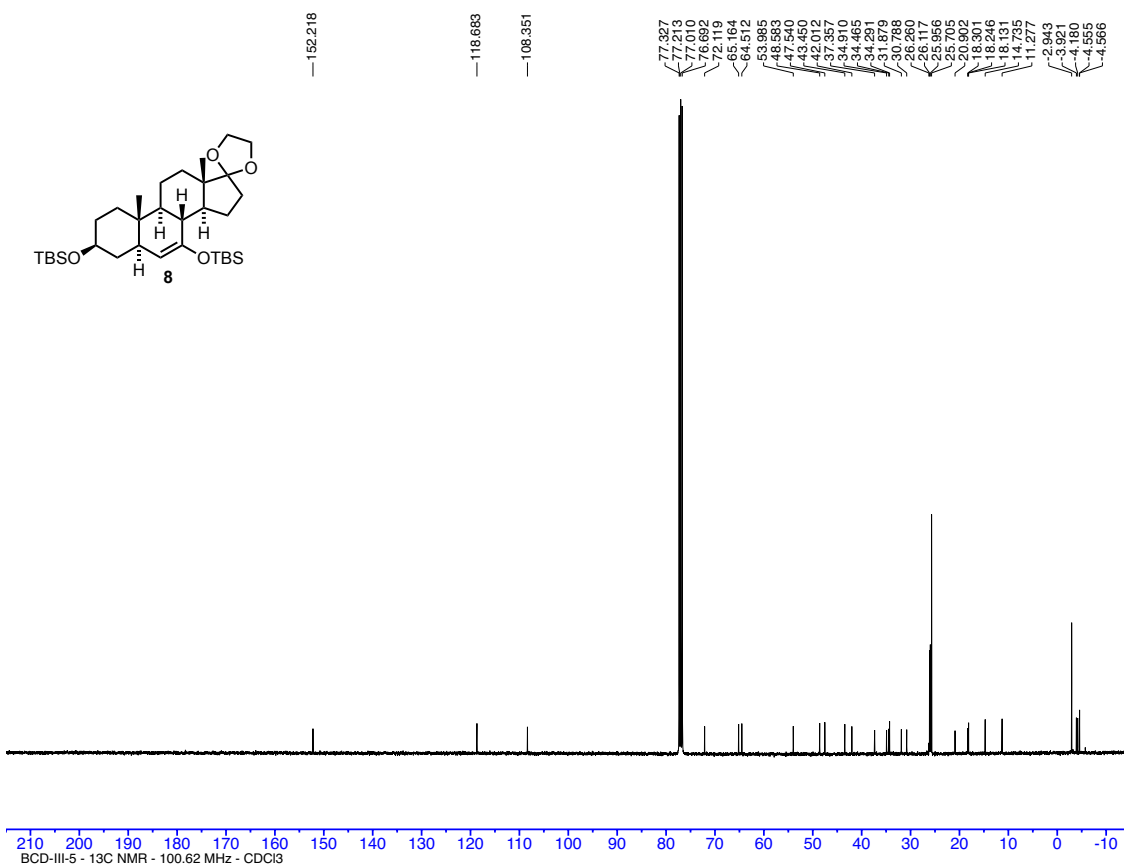

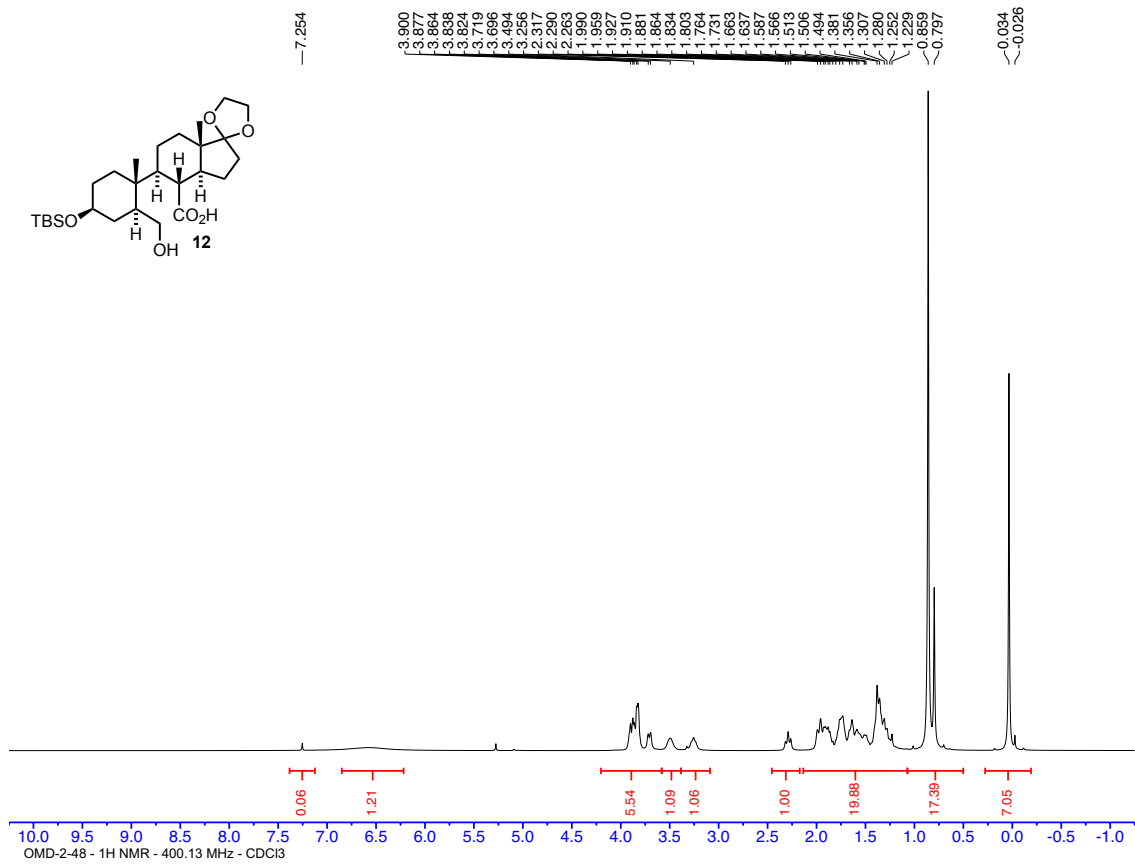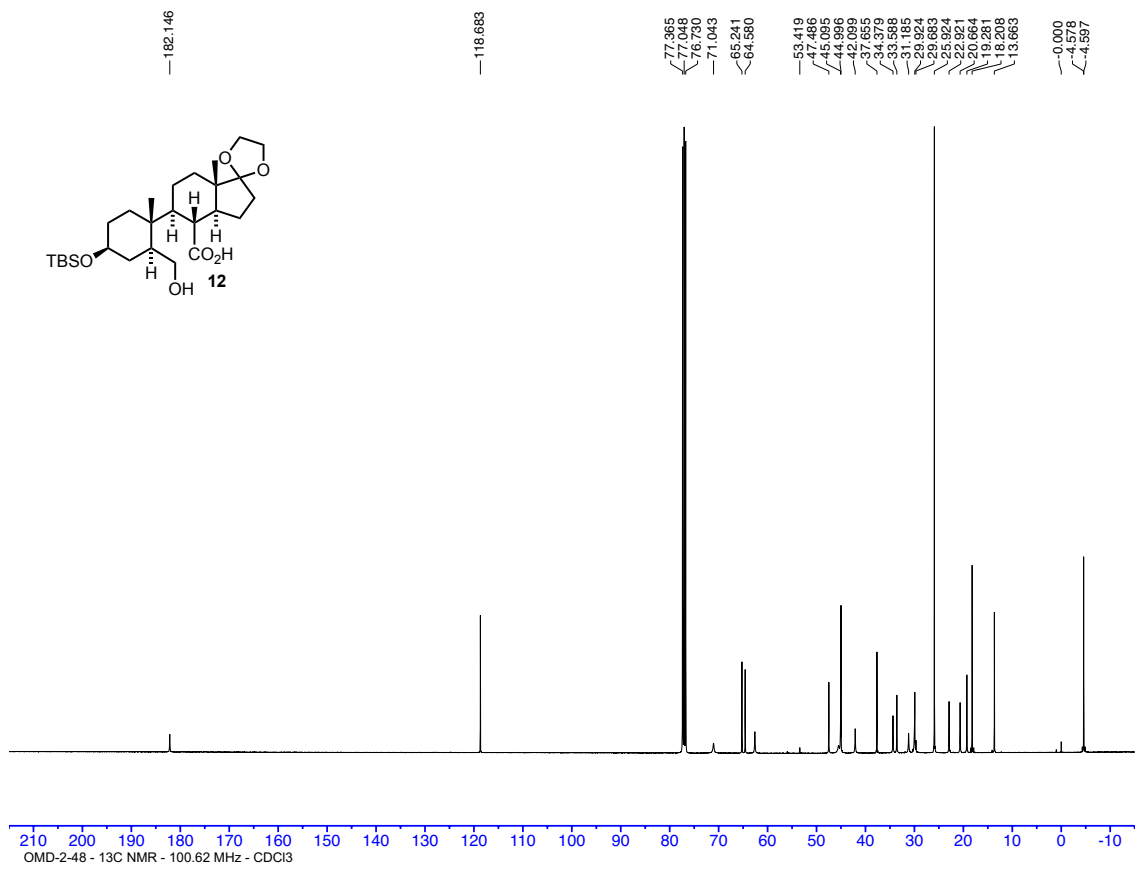

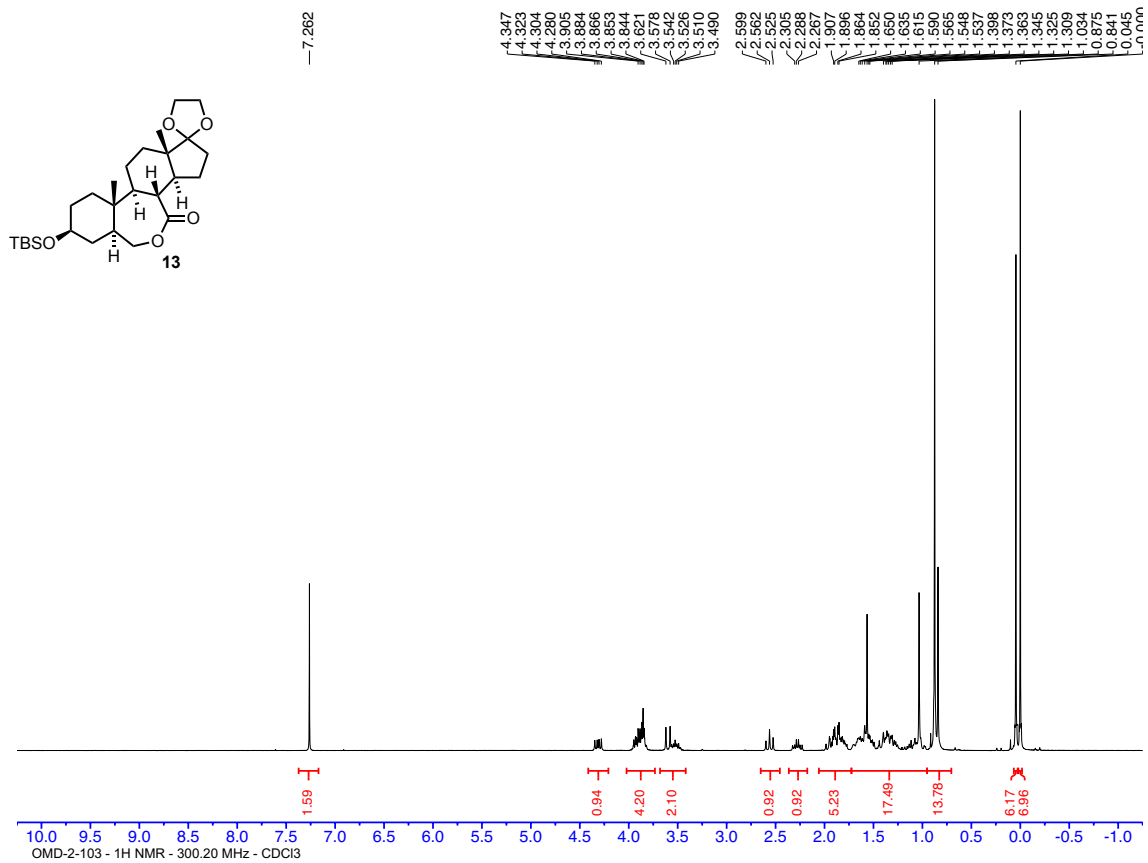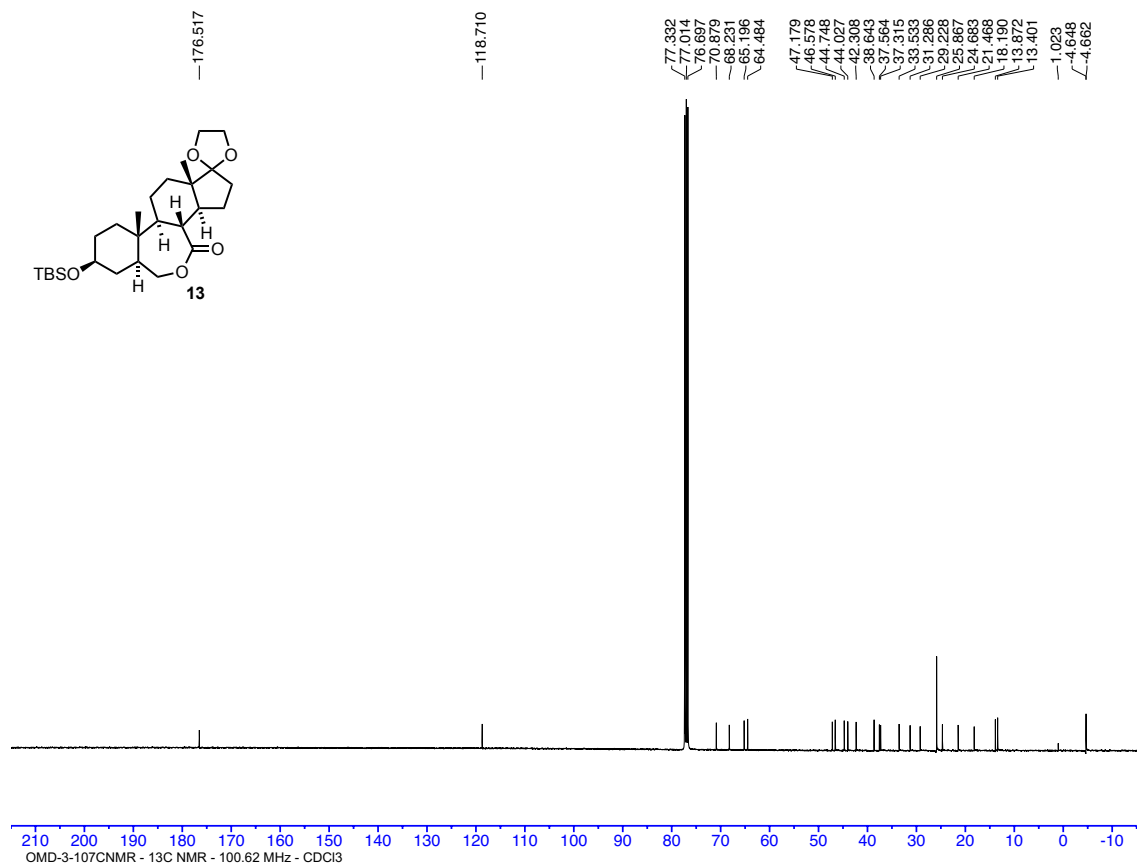

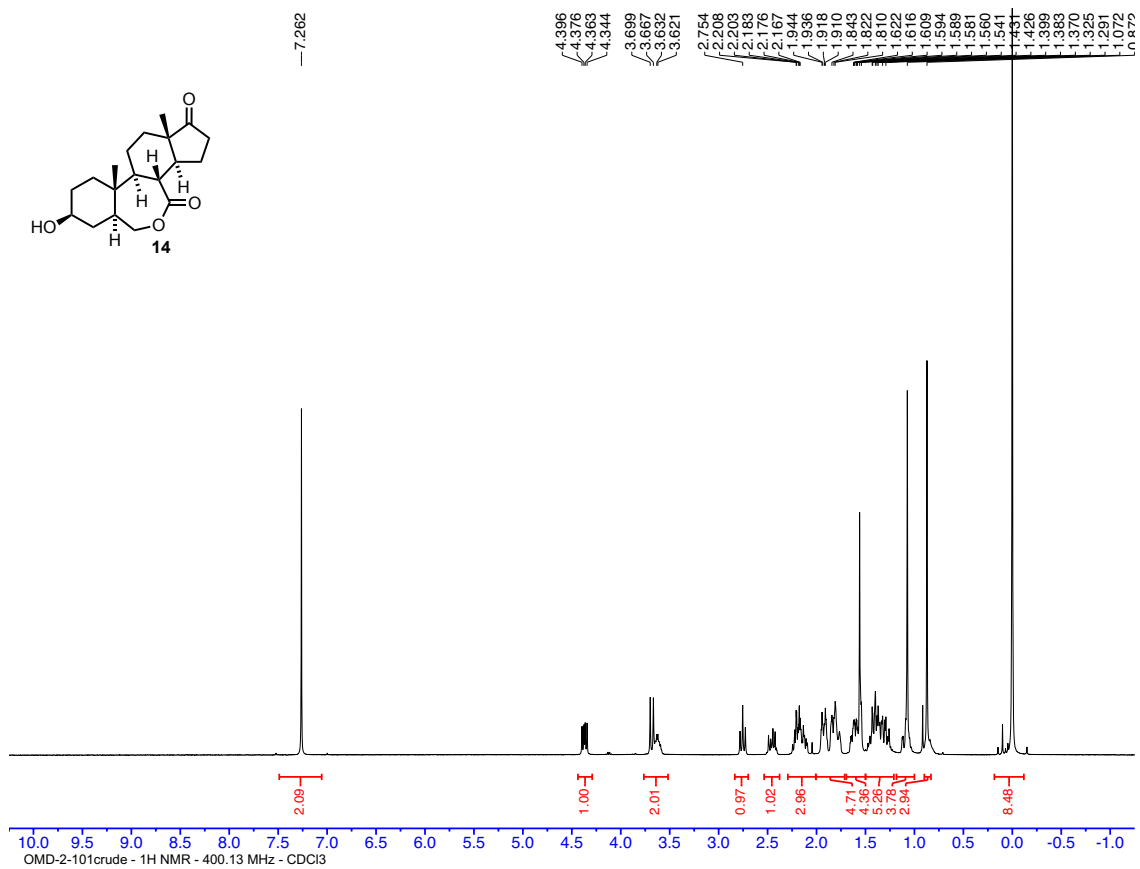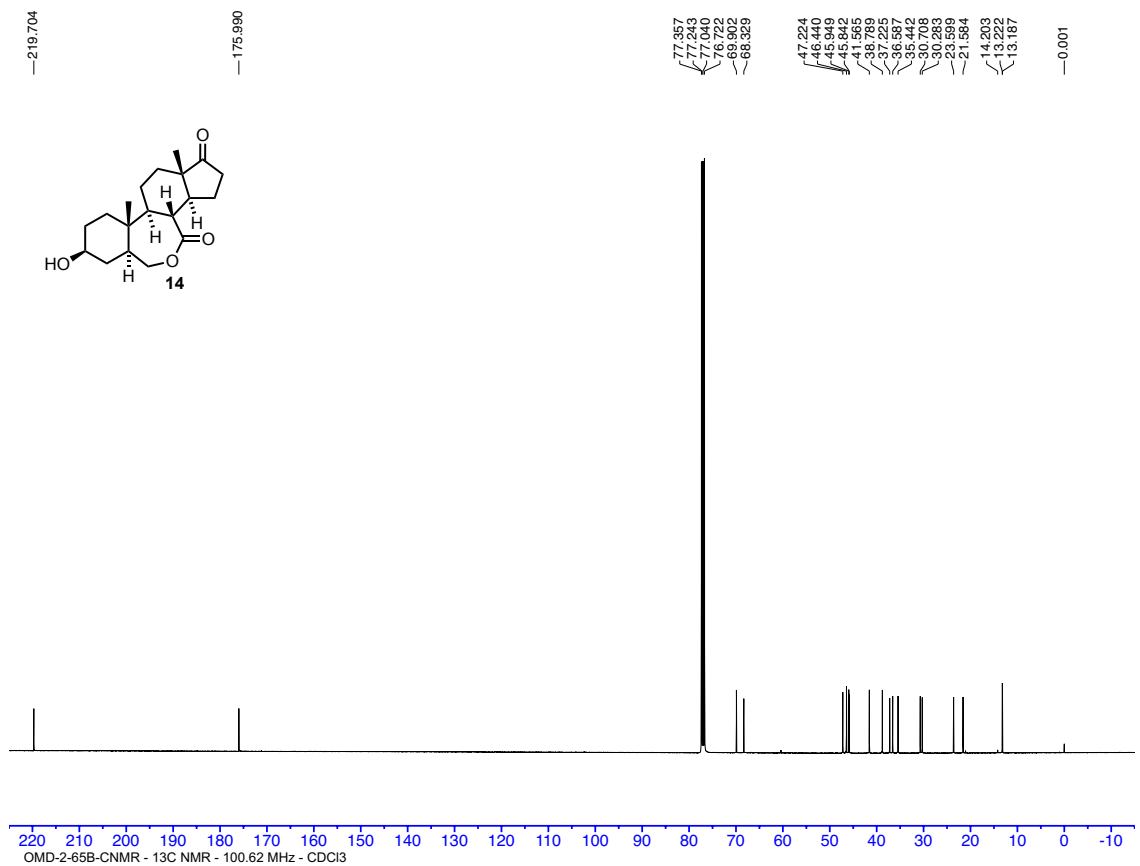

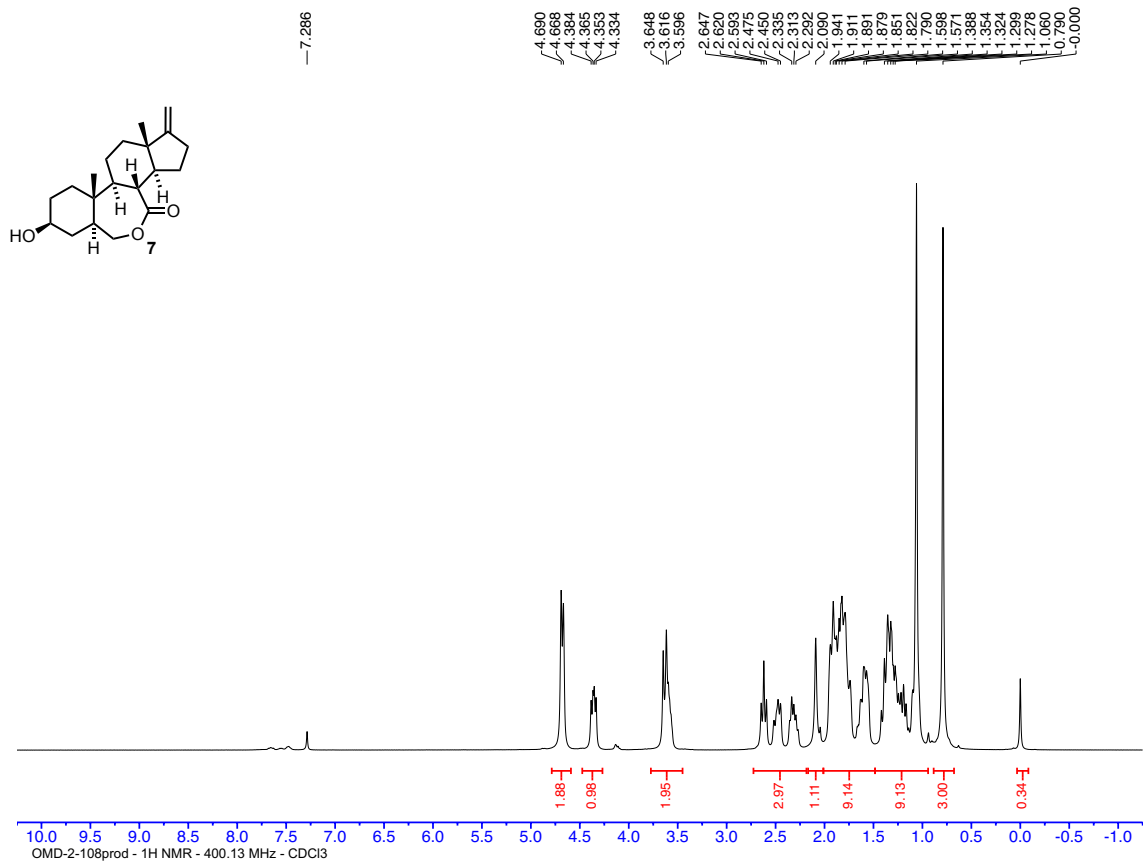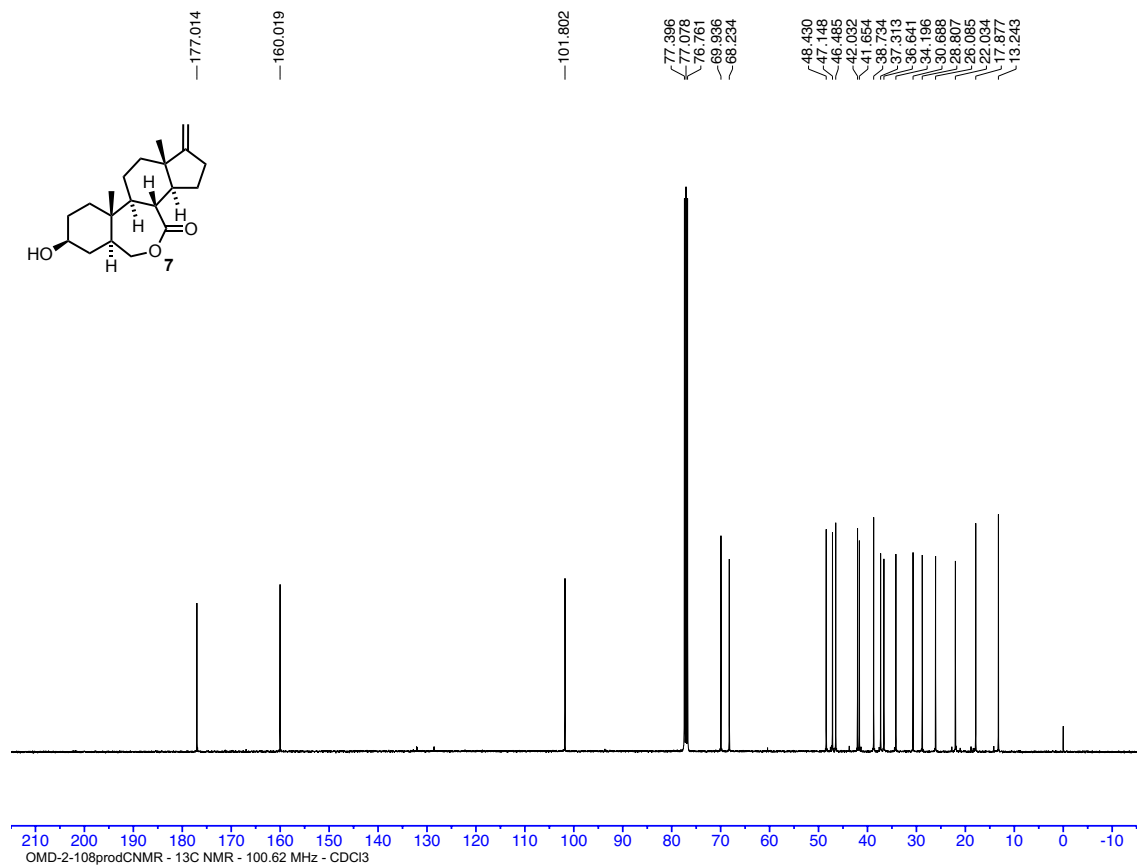

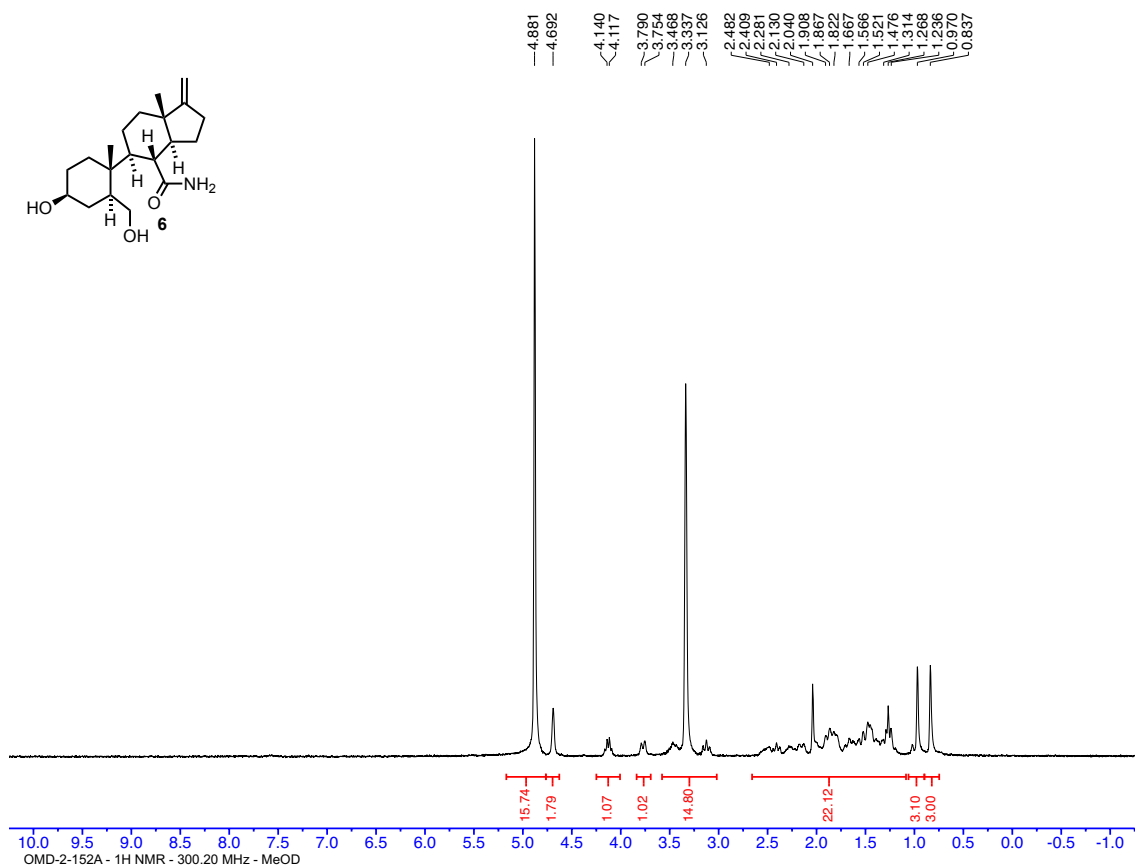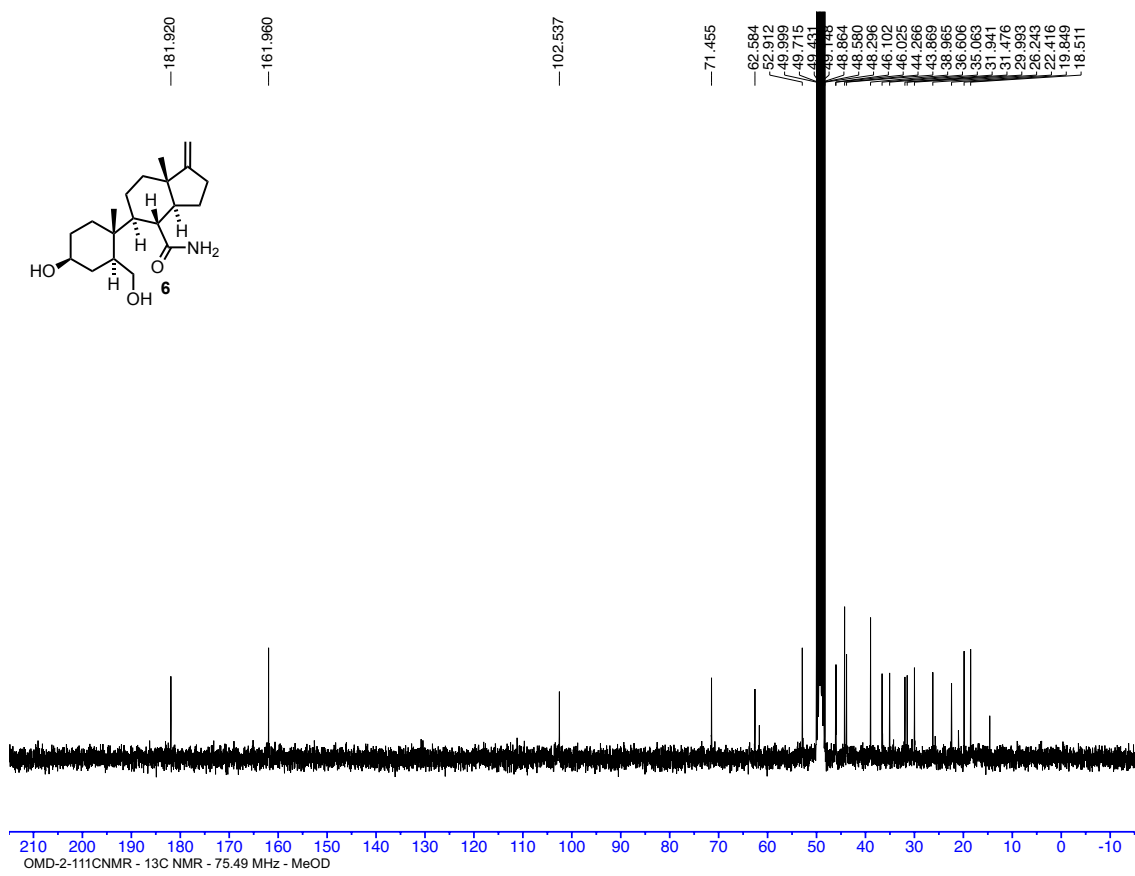

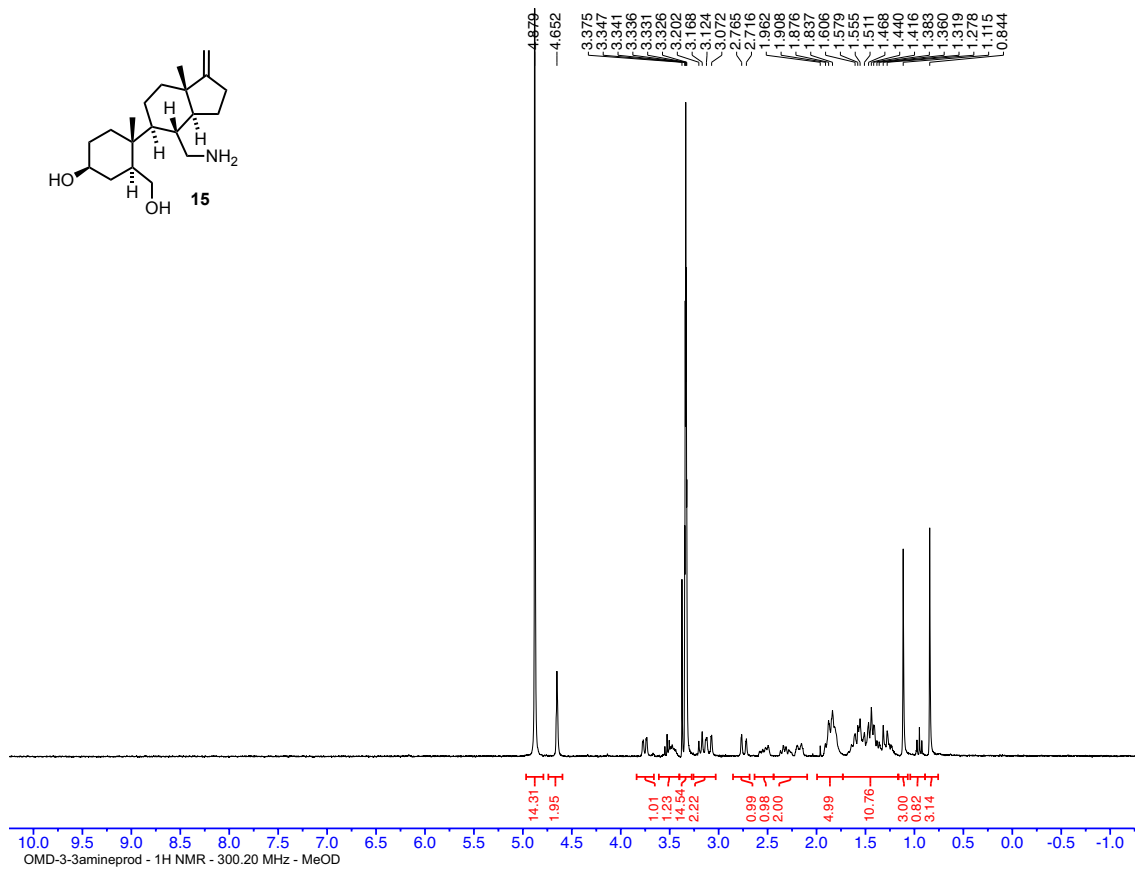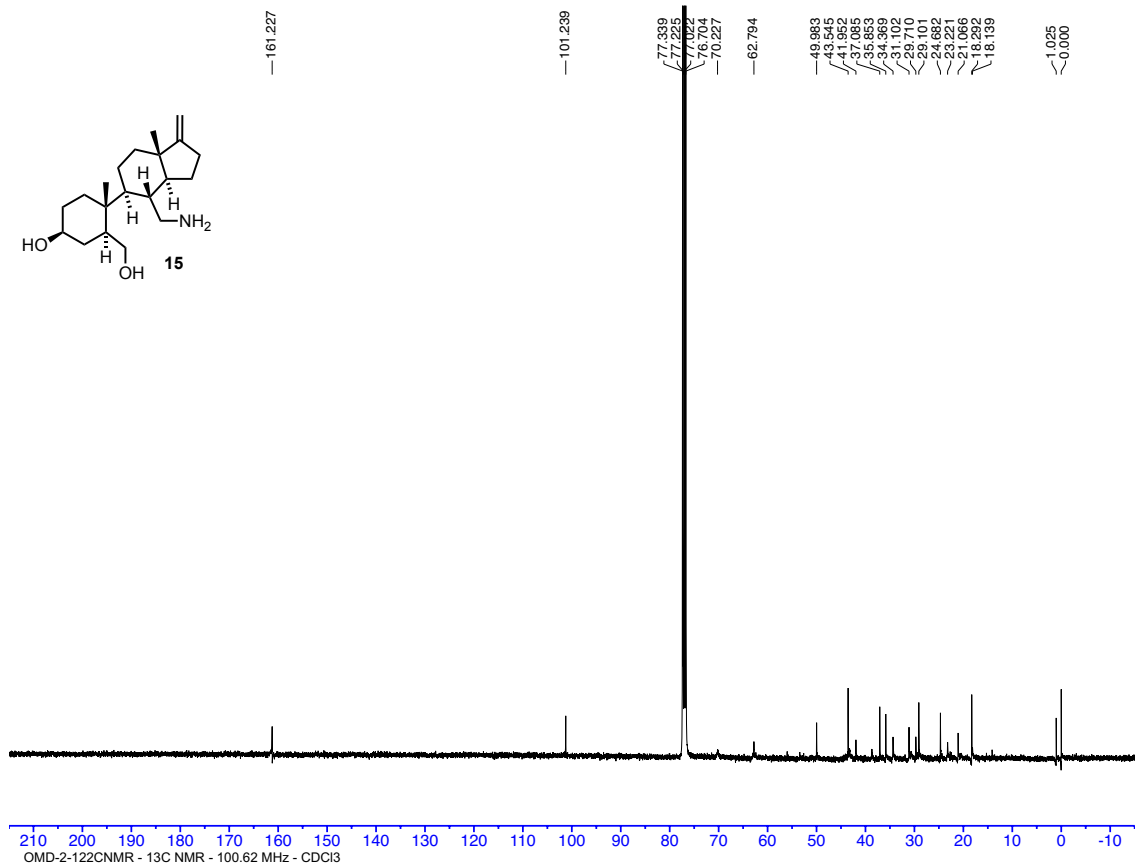

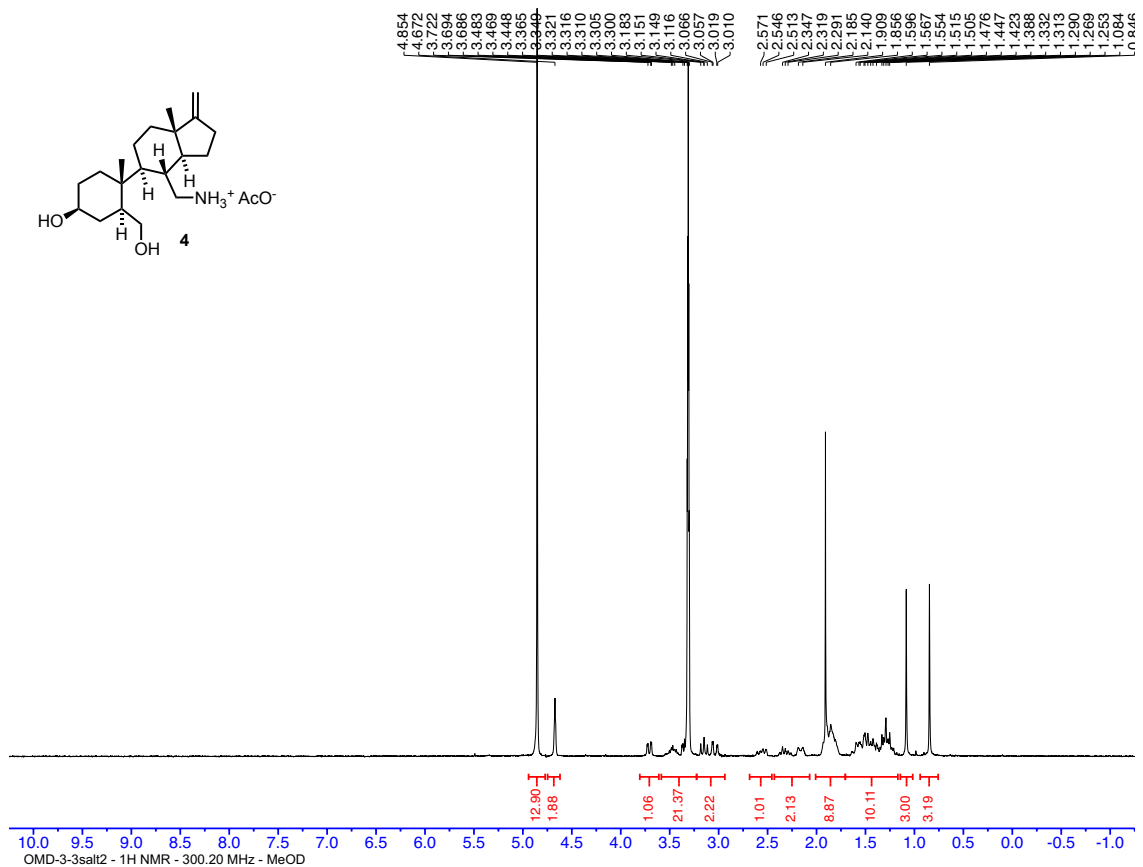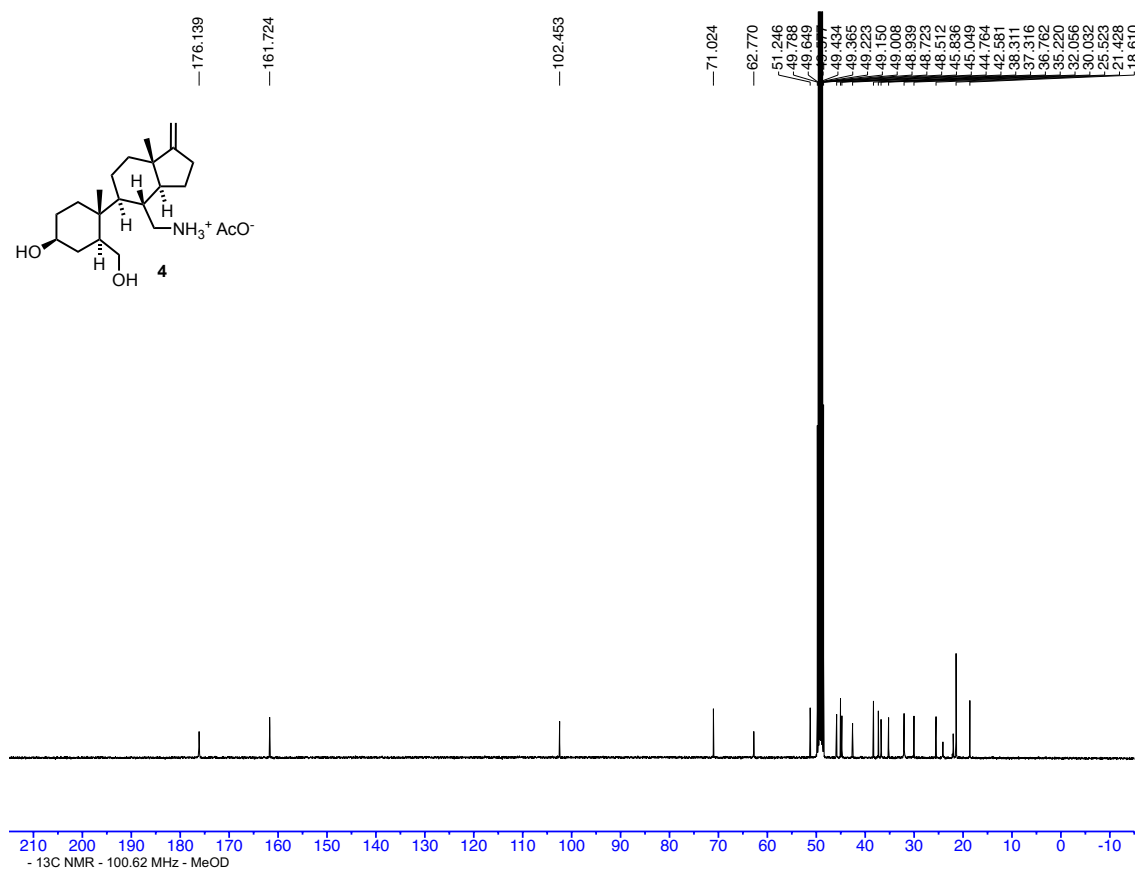



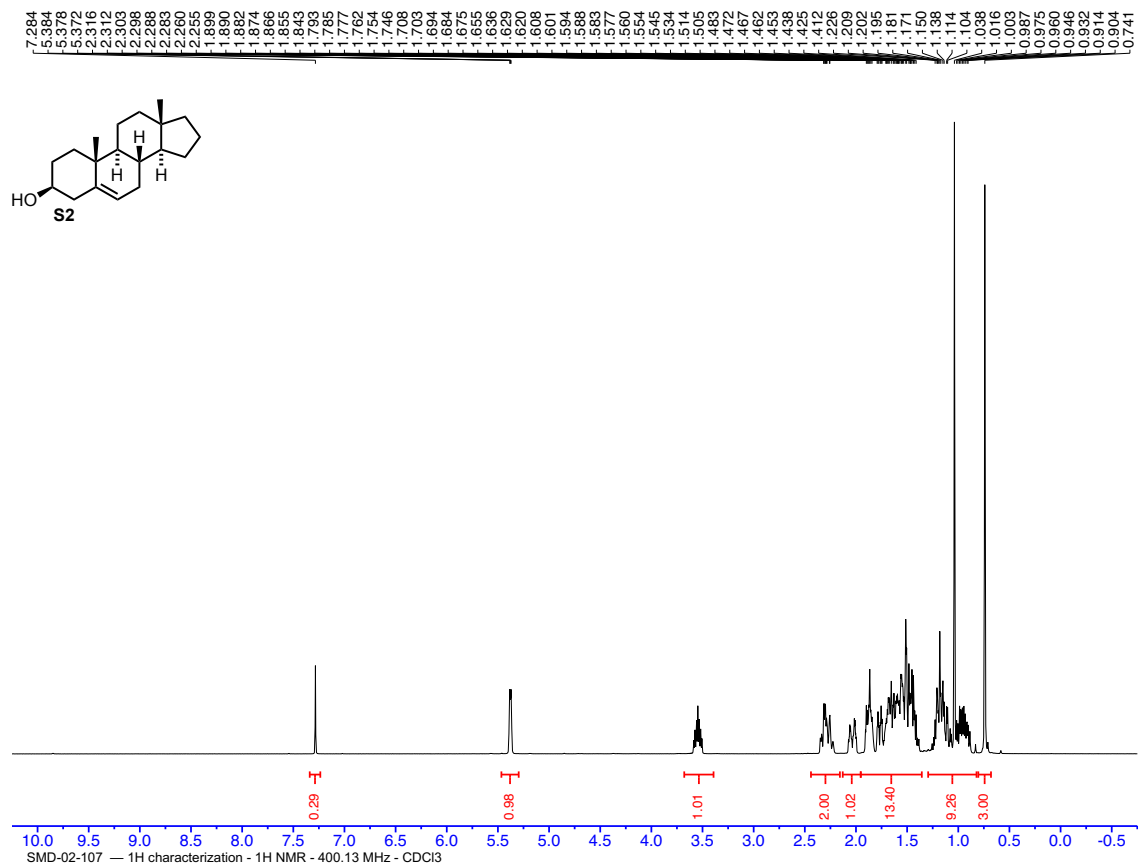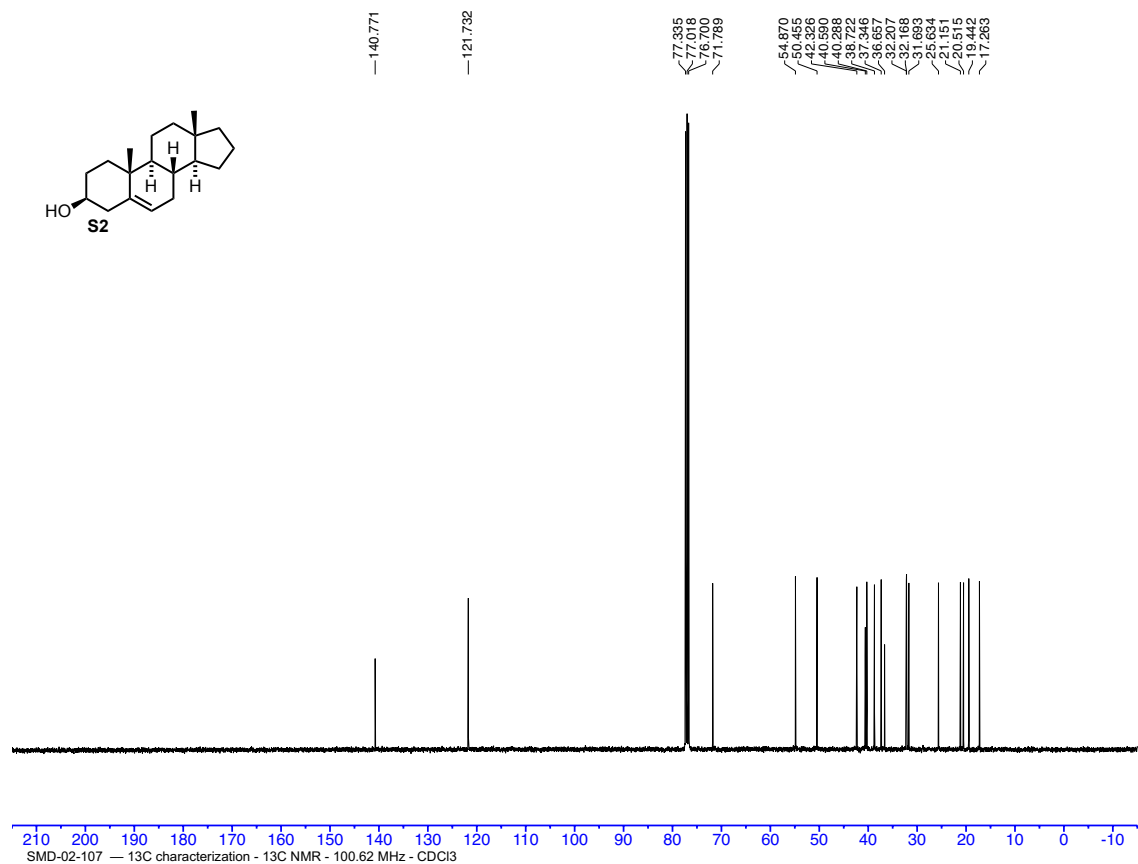

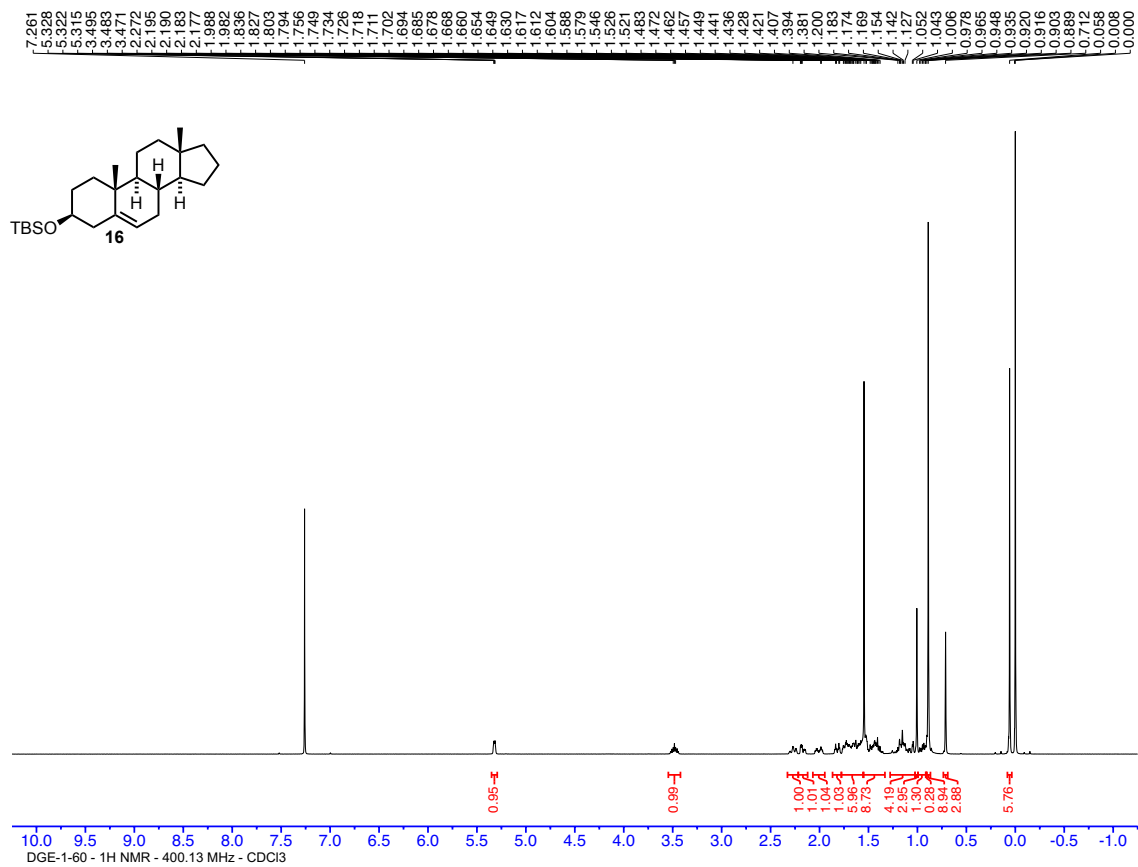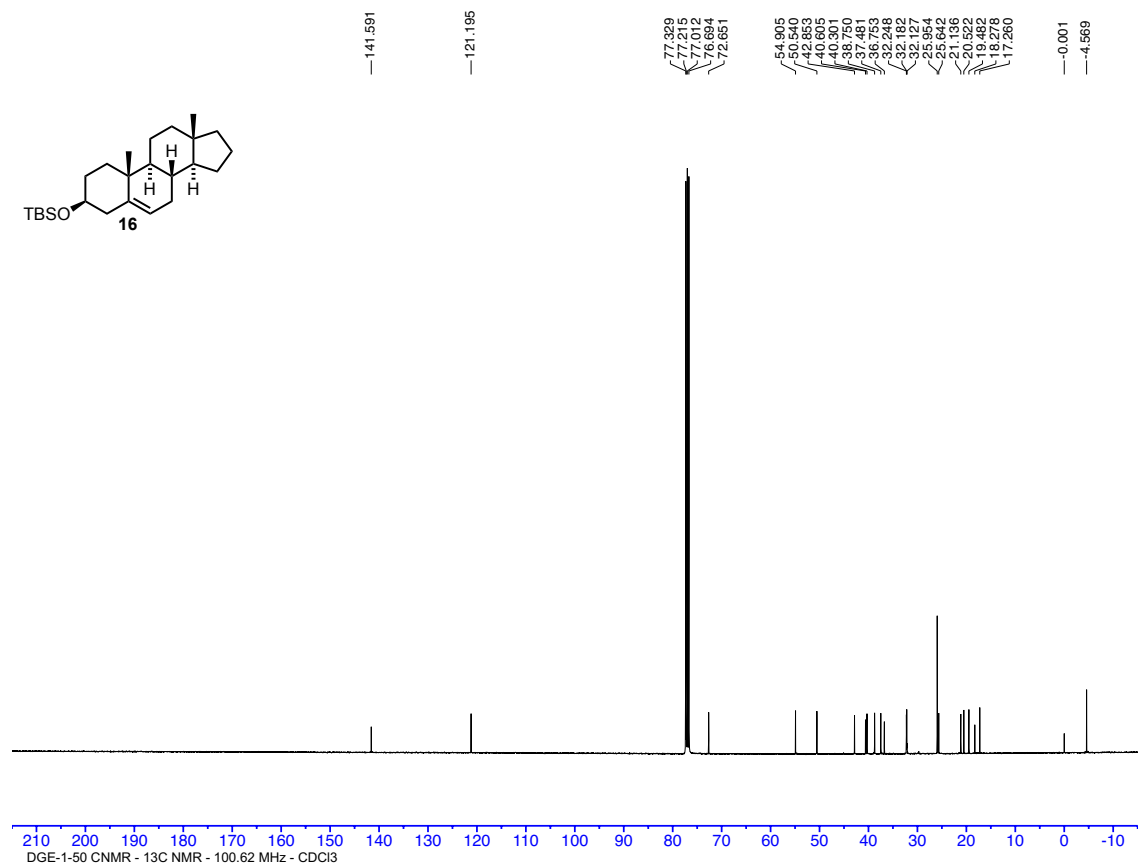

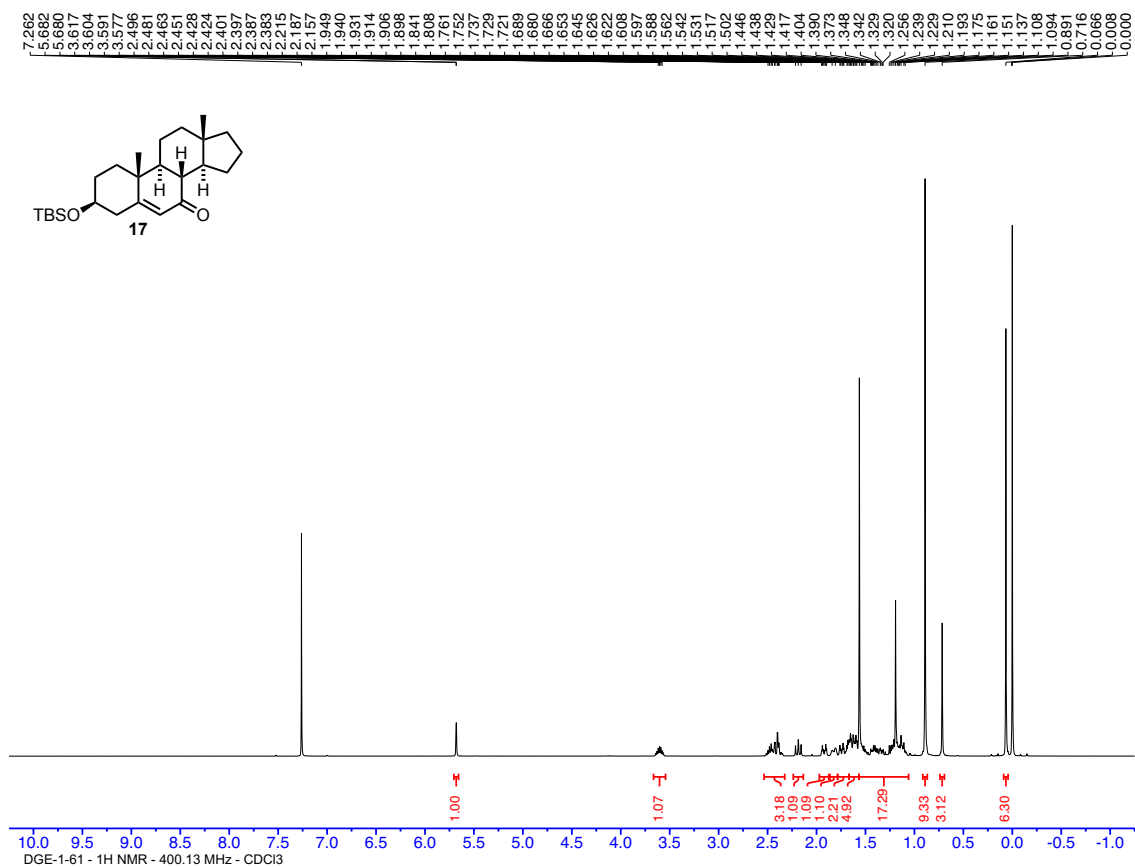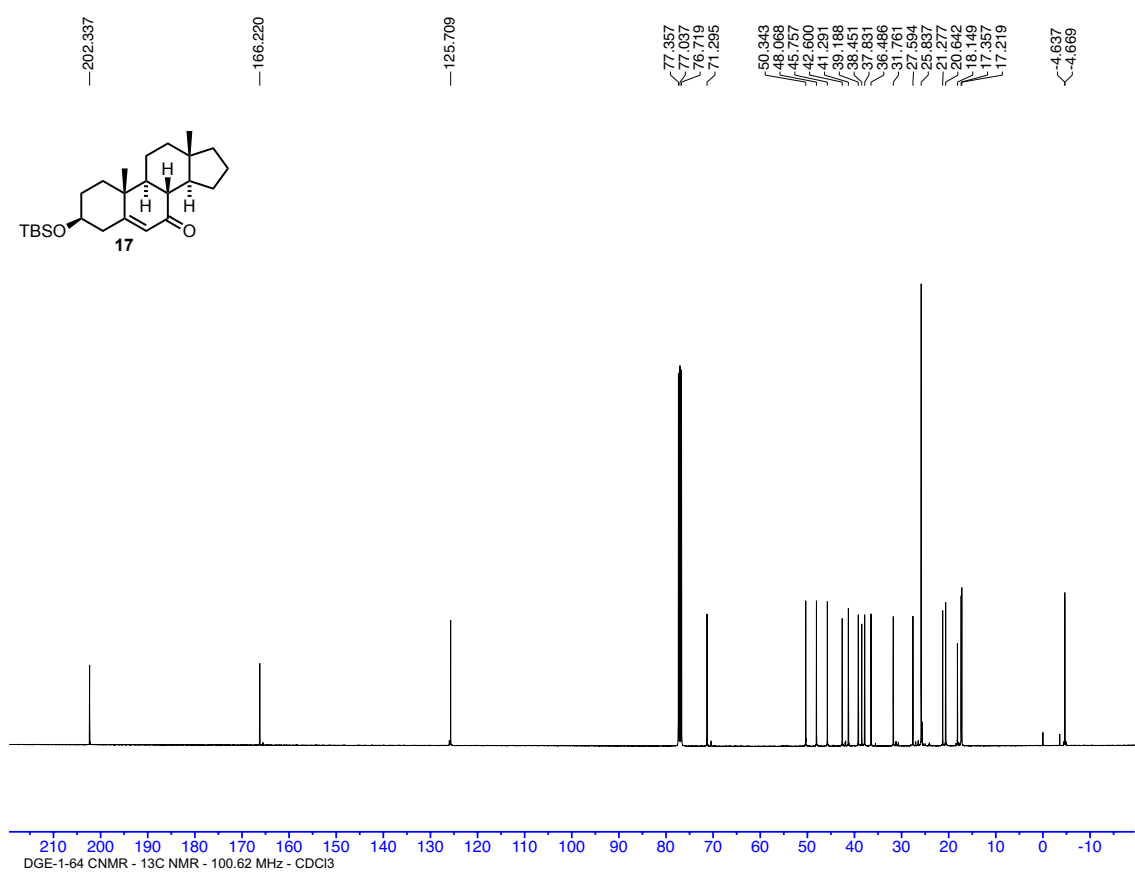



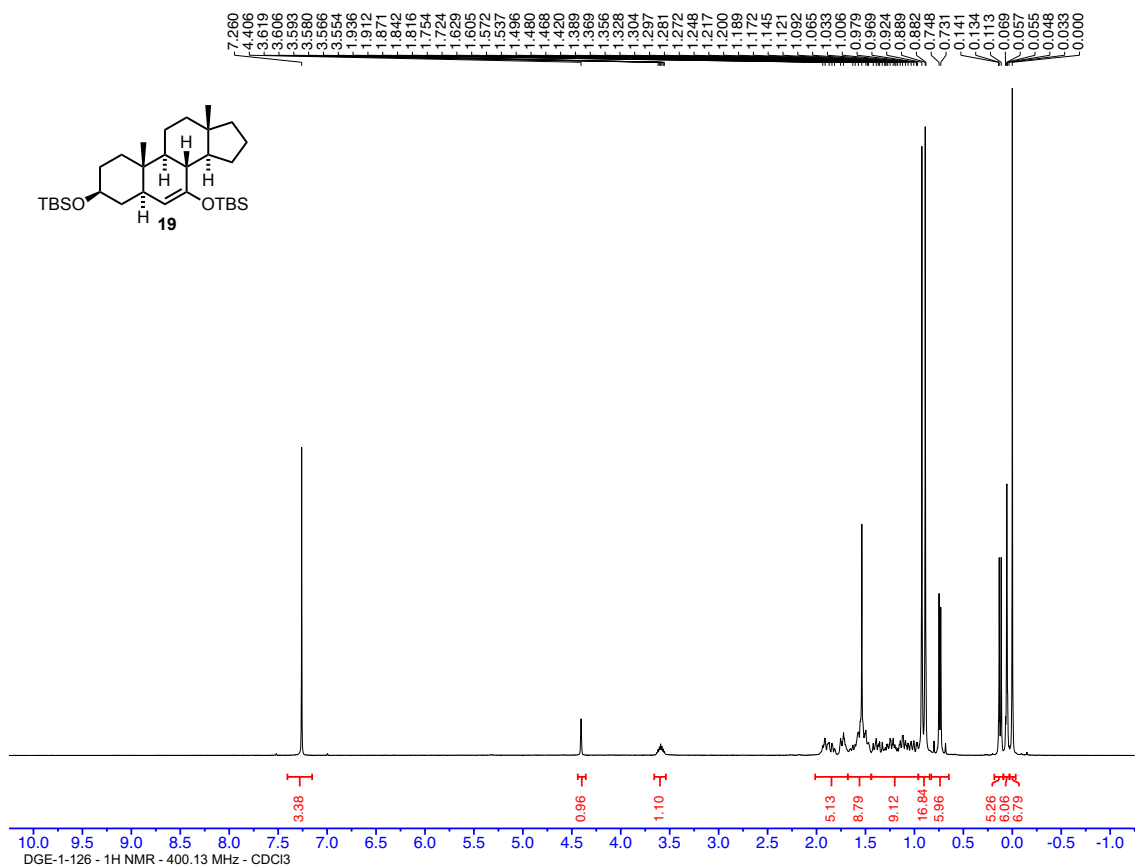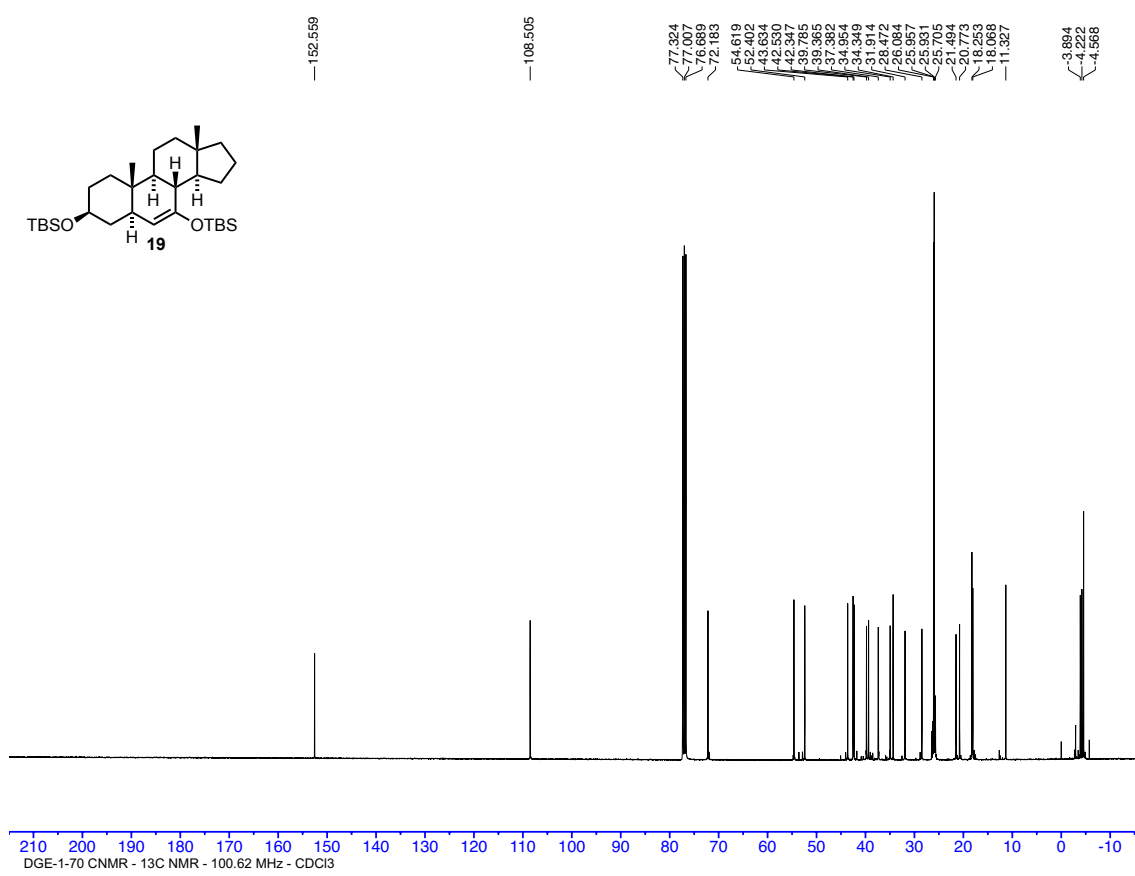

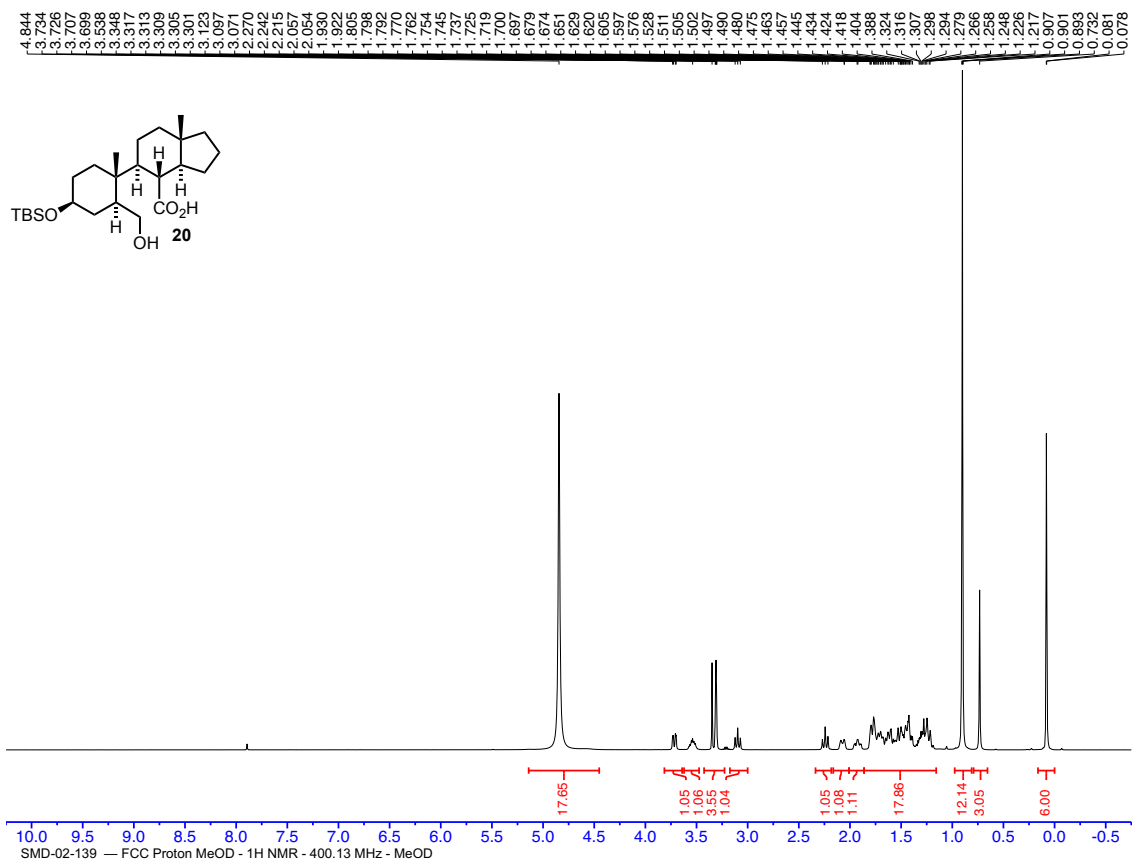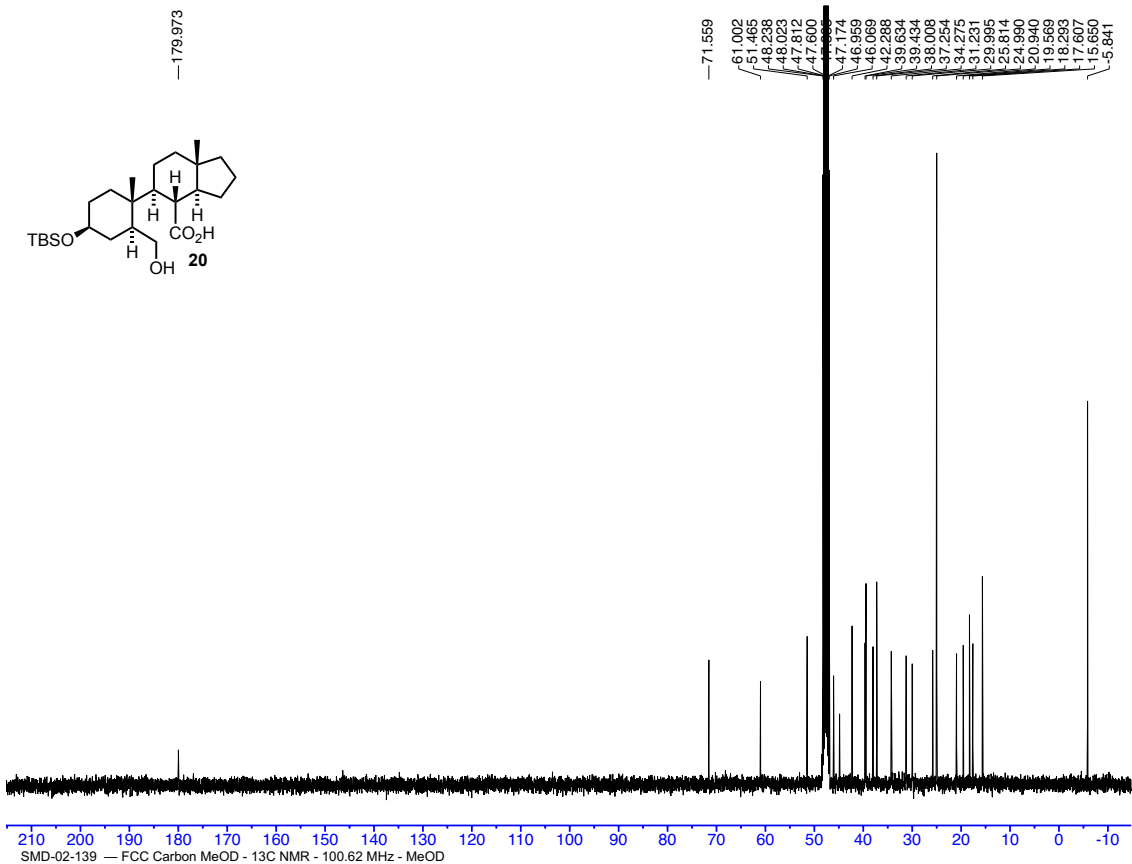

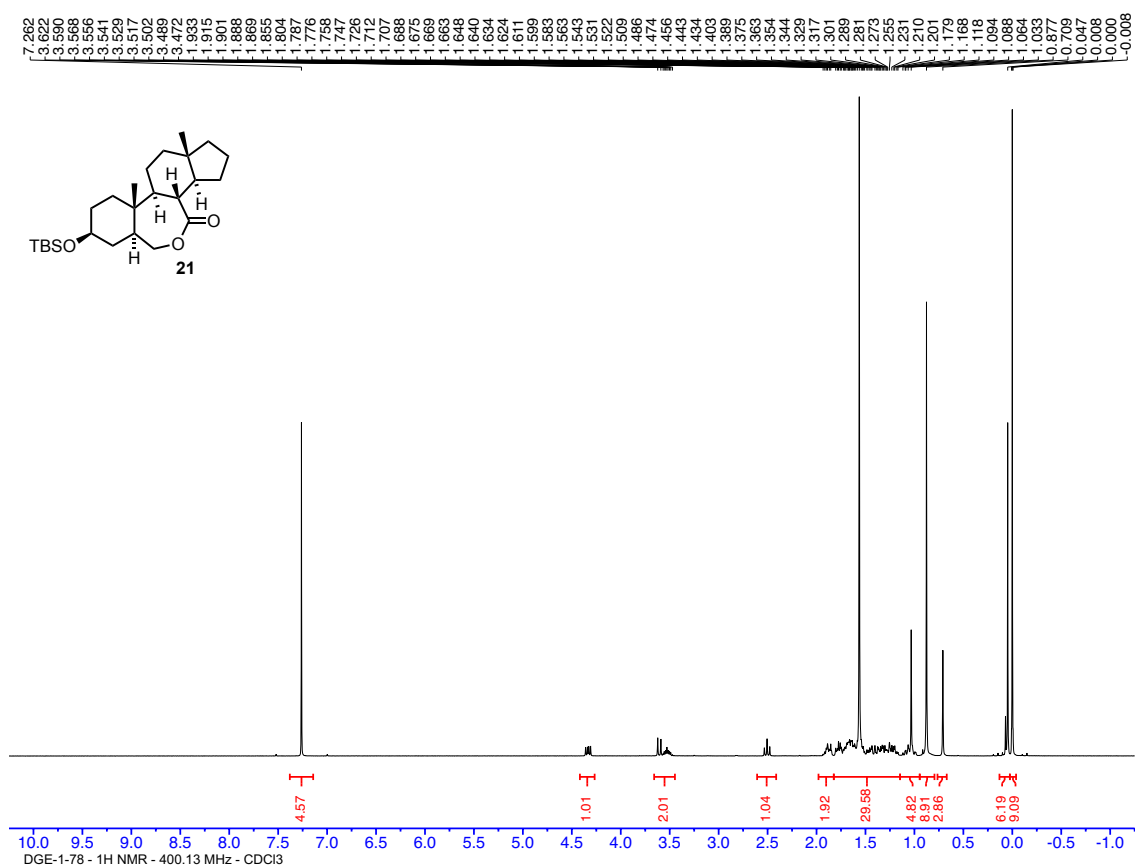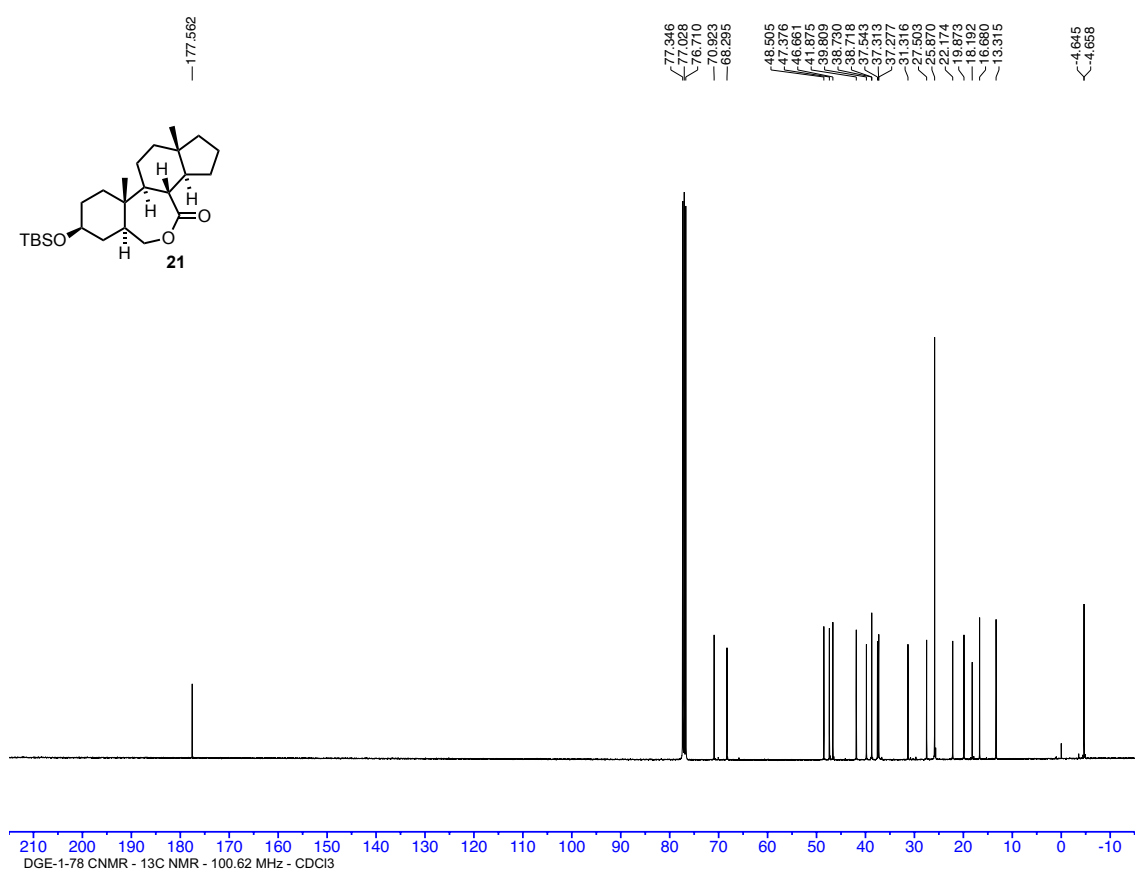

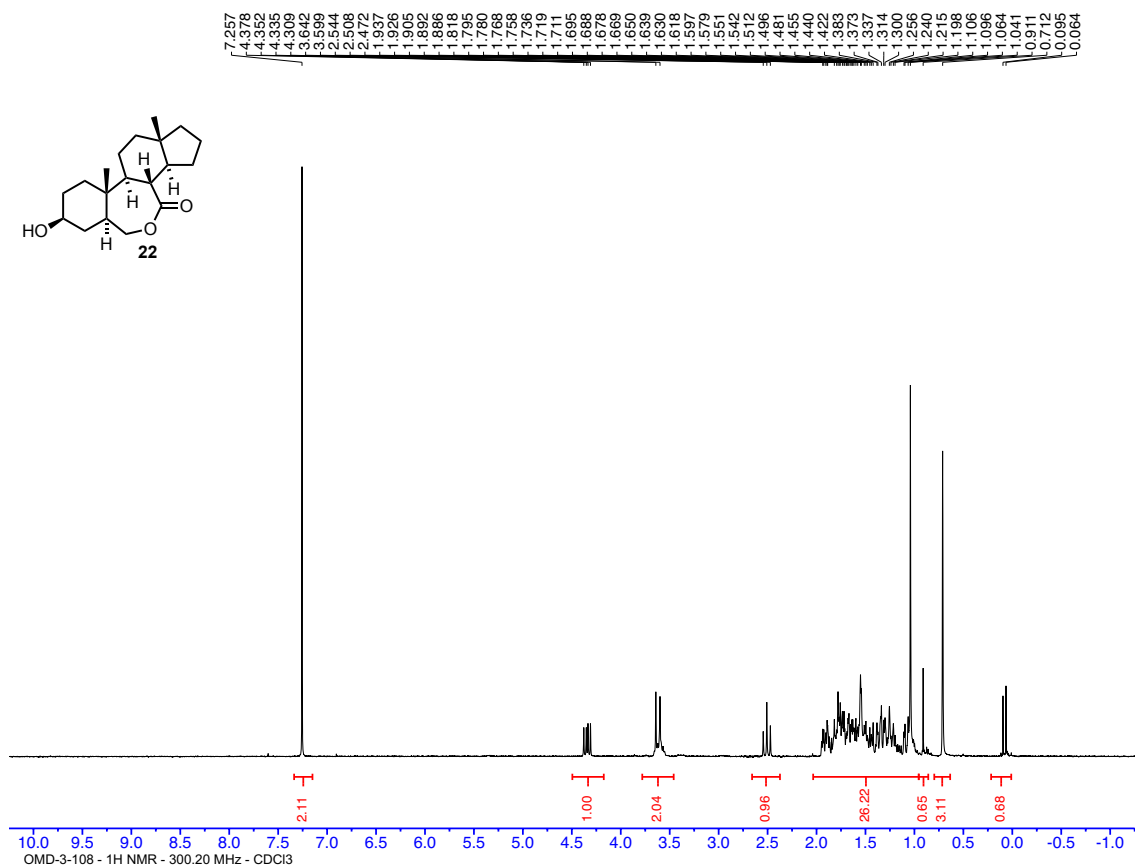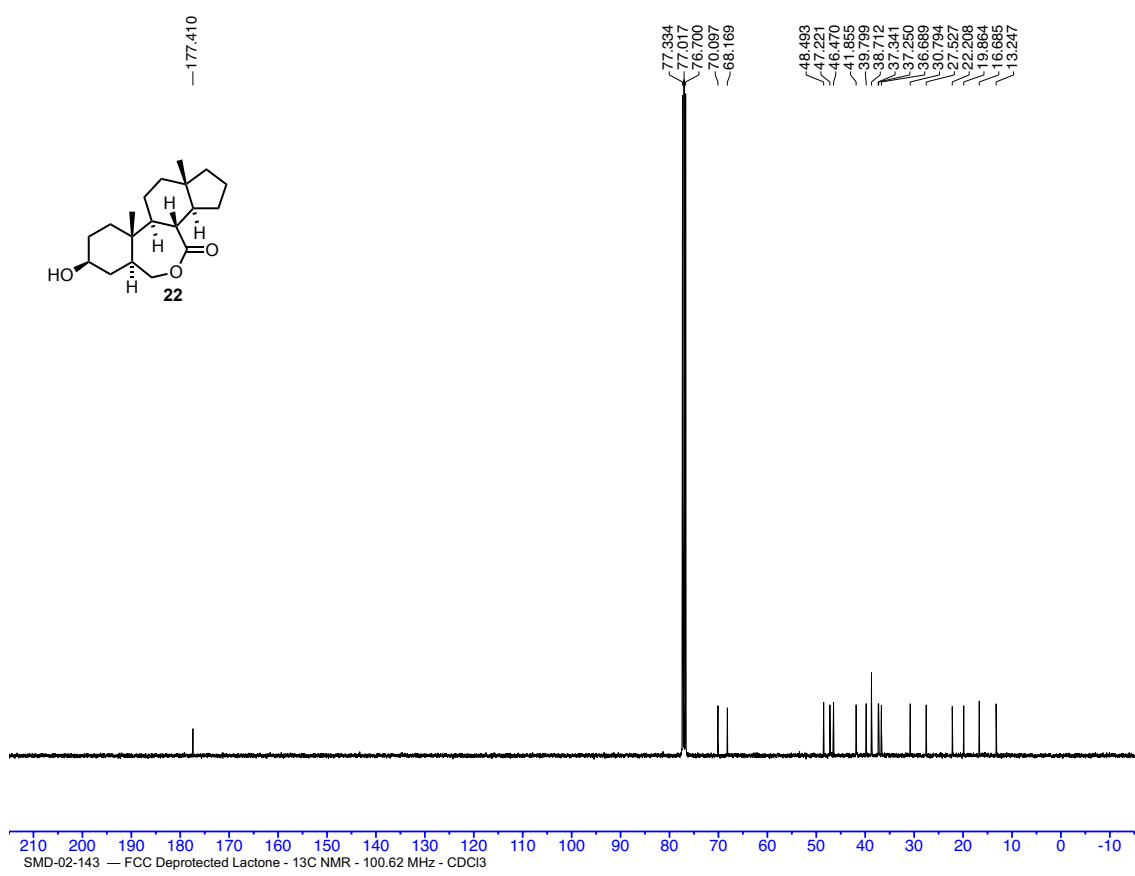



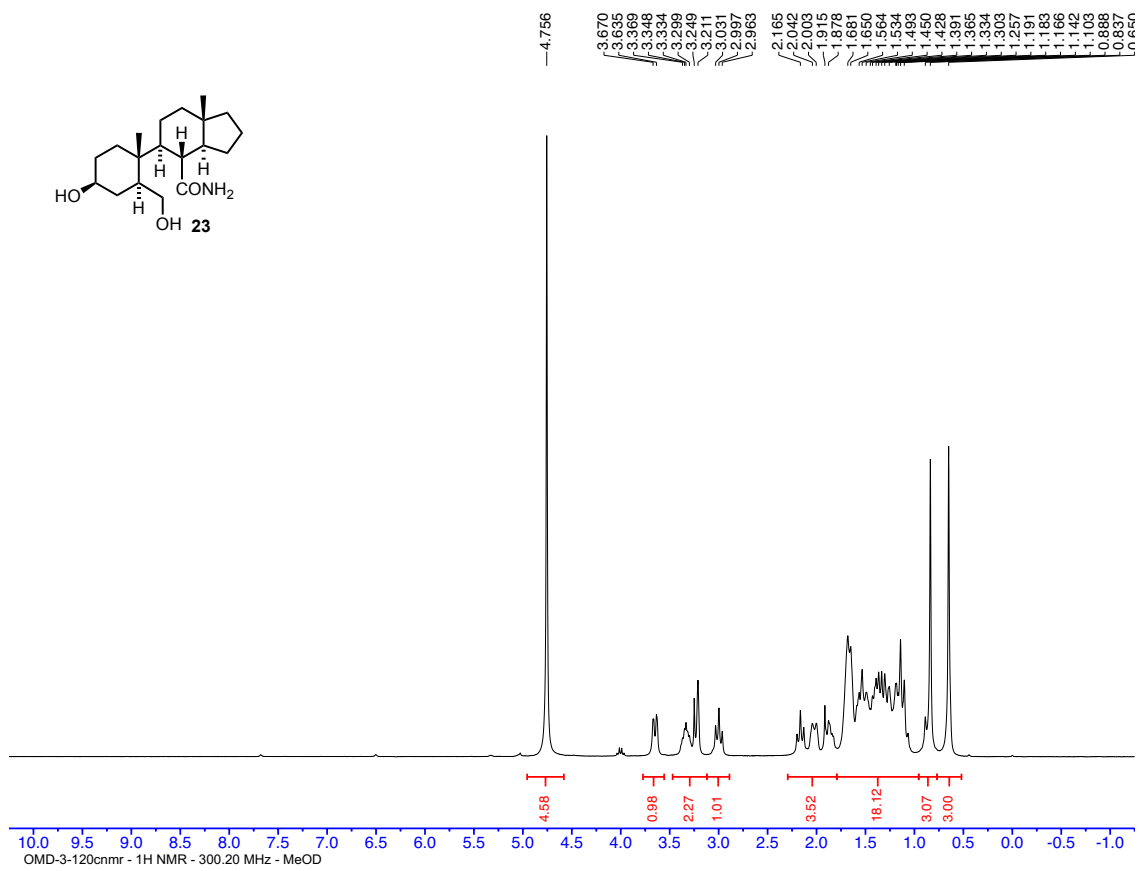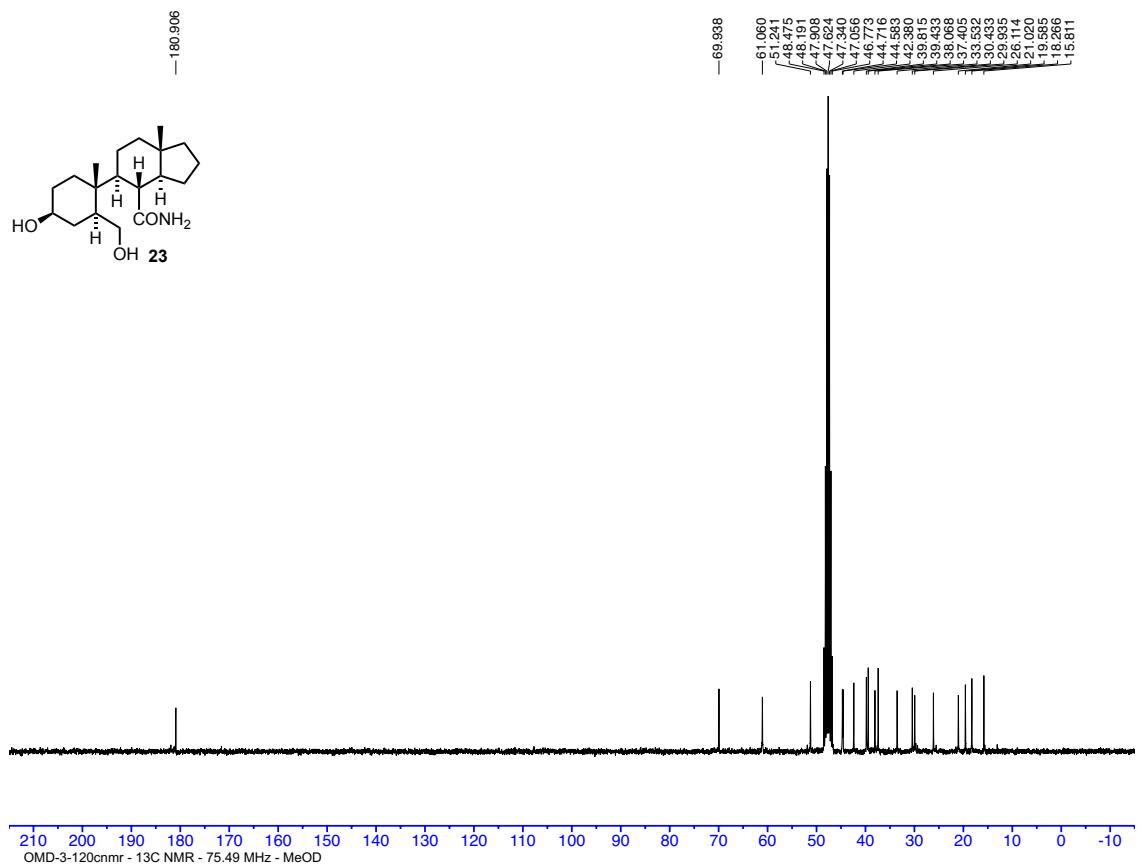

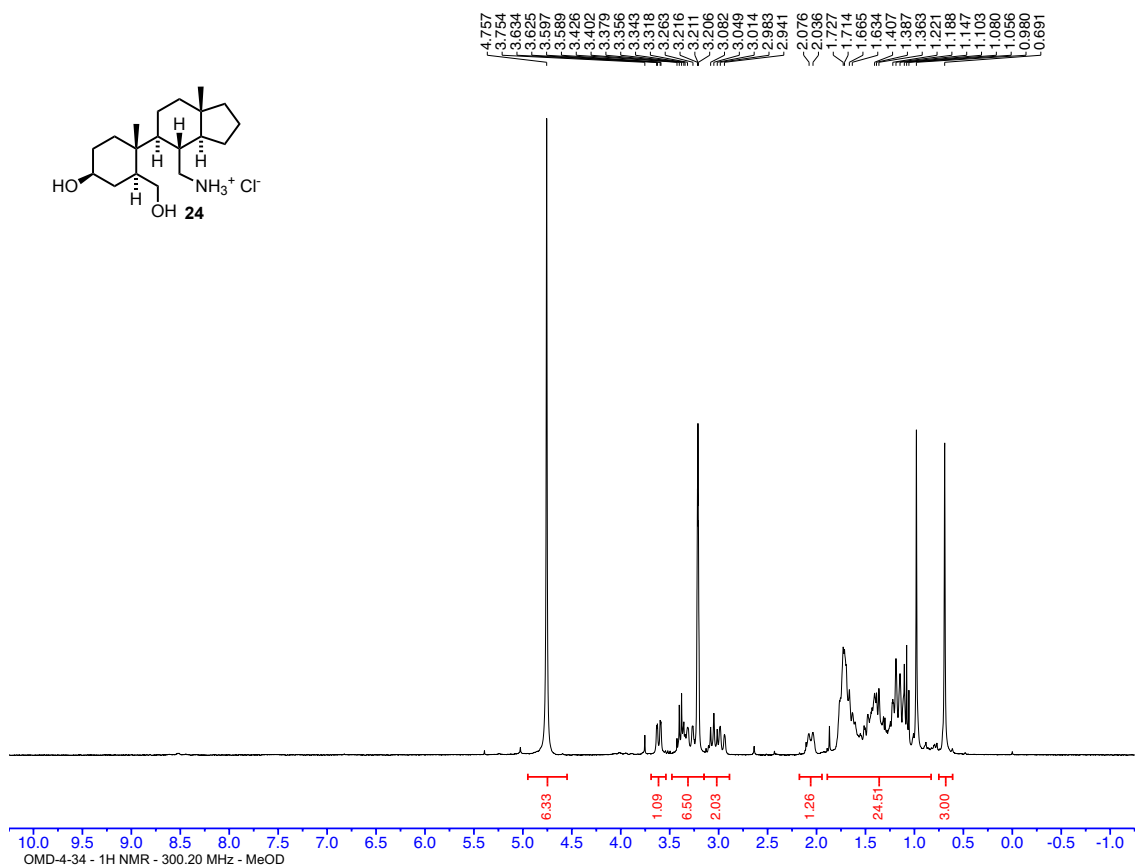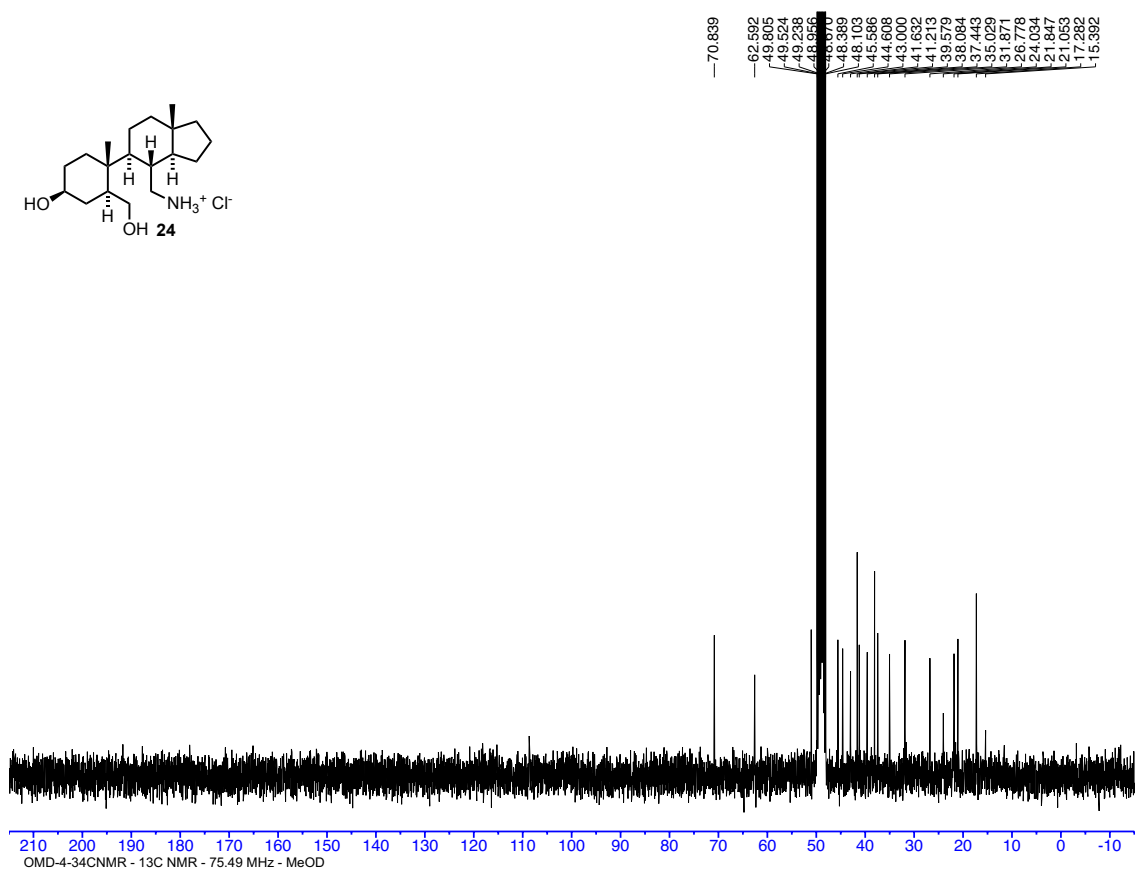

Supplement: d2ob00555g1.pdf [file d2ob00555g1.pdf]
